# GENESPACE: syntenic pan-genome annotations for eukaryotes

John T. Lovell<sup>1,2</sup>, Avinash Sreedasyam<sup>1</sup>, M. Eric Schranz<sup>3</sup>, Melissa A. Wilson<sup>4</sup>, Joseph W. Carlson<sup>2</sup>, Alex Harkess<sup>1,5</sup>, David Emms<sup>6</sup>, David Goodstein<sup>2</sup>, Jeremy Schmutz<sup>1,2</sup>

<sup>1</sup>Genome Sequencing Center, HudsonAlpha Institute for Biotechnology, Huntsville, AL, USA

<sup>2</sup>Joint Genome Institute, Lawrence Berkeley National Laboratory, Berkeley, CA, USA

<sup>3</sup>Biosystematics Group, Wageningen University and Research, Wageningen, The Netherlands

<sup>4</sup>Center for Evolution and Medicine, School of Life Sciences, Arizona State University, Tempe, AZ, USA

<sup>5</sup>Department of Crop, Soil, and Environmental Sciences, Auburn University, Auburn, AL, USA

<sup>6</sup>Oxford University, Oxford, United Kingdom

\*Corresponding author, email: [jlovell@hudsonalpha.org](mailto:jlovell@hudsonalpha.org)

**The development of multiple high-quality reference genome sequences in many taxonomic groups has yielded a high-resolution view of the patterns and processes of molecular evolution. Nonetheless, leveraging information across multiple reference haplotypes remains a significant challenge in nearly all eukaryotic systems. These challenges range from studying the evolution of chromosome structure, to finding candidate genes for quantitative trait loci, to testing hypotheses about speciation and adaptation in nature. Here, we address these challenges through the concept of a pan-genome annotation, where conserved gene order is used to restrict gene families and define the expected physical position of all genes that share a common ancestor among multiple genome annotations. By leveraging pan-genome annotations and exploring the underlying syntenic relationships among genomes, we dissect presence-absence and structural variation at four levels of biological organization: among three tetraploid cotton species, across 300 million years of vertebrate sex chromosome evolution, across the diversity of the Poaceae (grass) plant family, and among 26 maize cultivars. The methods to build and visualize syntenic pan-genome annotations in the GENESPACE R package offer a significant addition to existing gene family and synteny programs, especially in polyploid, outbred and other complex genomes.**

## 1 INTRODUCTION

2 *De novo* genome assemblies and gene model  
3 annotations represent increasingly common resources that  
4 describe the sequence and putative functions of protein  
5 coding and intergenic regions within a single genotype.  
6 Evolutionary relationships among these DNA sequences  
7 are the foundation of many molecular tools in modern  
8 medical, breeding and evolutionary biology research.  
9 Perhaps the most crucial inference to make when  
10 comparing genomes revolves around homologous genes,  
11 which share an evolutionary common ancestor and  
12 ensuing sequence or protein structure similarity. Analyses  
13 of homologs, including comparative gene expression,  
14 epigenetics, and sequence evolution, require the  
15 distinction between orthologs which arise from speciation  
16 events, and paralogs, which arise from sequence  
17 duplications. In some systems, this is a simple task where  
18 most genes are single copy, and orthologs are  
19 synonymous with reciprocal best-scoring BLAST hits.  
20 Other sequence similarity approaches such as OrthoFinder  
21 (1, 2) leverage graphs and gene trees to test for orthology,  
22 permitting more robust analyses in systems with gene copy  
23 number (CNV) or presence-absence variation (PAV).  
24 However, whole-genome duplications (WGDs),  
25 chromosomal deletions, and variable rates of sequence  
26 evolution, such as sub-genome dominance in polyploids,  
27 can confound the evidence of orthology from sequence  
28 similarity alone.

29 The physical position of homologs offers a second line  
30 of evidence that can help to overcome challenges posed  
31 by WGDs, tandem arrays, heterozygous-duplicated  
32 regions, and other genomic complexities (3–5). Synteny, or  
33 the conserved order of DNA sequences among  
34 chromosomes that share a common ancestor, is a typical  
35 feature of eukaryotic genomes. In some taxa, synteny is  
36 preserved across hundreds of millions of years of evolution  
37 and is retained over multiple whole genome duplications  
38 (6–8). Such signals of evolutionary coalescence are often  
39 lost in DNA sequences of protein coding genes. Like  
40 chromosomal scale synteny, conserved gene order  
41 collinearity along local regions of chromosomes can  
42 provide evidence of homology, and in some cases enable  
43 determinations of whether two regions diverged as a result  
44 of speciation or a large scale duplication event (5). Combined,  
45 evidence of gene collinearity and sequence similarity  
46 should improve the ability to classify paralogous and  
47 orthologous relationships beyond either approach in  
48 isolation.

49 Integrating synteny and collinearity into comparative  
50 genomics pipelines also physically anchors the positions  
51 of related gene sequences onto the assemblies of each  
52 genome. For example, by exploring only syntenic orthologs  
53 it is possible to examine all putatively functional variants  
54 within a genomic region of interest, even those that are  
55 absent in the focal reference genome (9). Such a pan-  
56 genome annotation framework (10) would permit easy  
57 access to multi-genome networks of high-confidence

58 orthologs and paralogs, regardless of ploidy or other  
59 complicating aspects of genome biology. Here, we present  
60 GENESPACE, an analytical pipeline (Supplemental Fig. 1)  
61 that explicitly links synteny and sequence similarity to  
62 provide high-confidence inference about networks of  
63 genes that share a common ancestor, and represents  
64 these networks as a pan-genome annotation. We then  
65 leverage this framework to explore gene family evolution in  
66 flowering plants, mammals and reptiles.

## 67 RESULTS AND DISCUSSION

### 69 GENESPACE methods to compare multiple complex 70 genomes

71 Until recently, most genome assemblies were haploid,  
72 representing meiotically homologous chromosomes as a  
73 single haplotype. While this is certainly appropriate for  
74 inbred or haploid species, such a representation does not  
75 adequately address heterozygosity in outbred species or  
76 homeologous chromosomes, which have diverged  
77 following a whole-genome duplication in polyploid  
78 genomes. With the advent of accurate long-read  
79 sequencing, many state-of-the-art genomes of diploid  
80 eukaryotes are now phased, representing both  
81 homologous chromosomes in the assembly (10, 11). The  
82 representation of both meiotically homologous  
83 chromosomes in outbred diploids introduces a problem  
84 well known in polyploid comparative genomics: paralogs,  
85 which are duplicated within a genome, such as homeologs  
86 in polyploids or meiotic homologs in outbred diploid  
87 genomes, are not as accurately inferred as single-copy  
88 orthologs among genomes by graph-based clustering  
89 programs. This challenge can be easily addressed in  
90 genomes with two complete and easily identifiable sub-  
91 genomes (or alternative haplotypes) by splitting  
92 chromosomes into separate haploid genomes. However,  
93 this splitting approach is not possible in many outbred or  
94 polyploid genomes due to chromosomal rearrangements  
95 (e.g. maize, see below), and segmental duplications or  
96 deletions (e.g. sex chromosomes, see below). Given these  
97 known biases, it is crucial to develop a comparative  
98 genomics framework that performs adequately in outbred  
99 and polyploid genomes.

100 GENESPACE overcomes the challenge of accurately  
101 finding homeologous or meiotically homologous gene pairs  
102 by constraining orthogroups (OGs) within syntenic regions.  
103 In short, GENESPACE subsets raw global OrthoFinder  
104

105 OGs to synteny by dropping graph edges that span non-  
106 syntenic genomic coordinates, thus producing split  
107 synteny-constrained OG subgraphs (Supplemental Fig. 1).  
108 GENESPACE can then run OrthoFinder on BLAST hits  
109 within syntenic regions which, when merged with synteny-  
110 constrained OGs, produces within-block OGs. Within-  
111 block graphs can better capture subgraphs containing  
112 distant paralogs because hit scores outside of the focal  
113 region are not considered, thereby effectively inferring  
114 paralogs with similar efficacy to orthologs (Table 1).  
115 GENESPACE then projects the syntenic position of each  
116 orthogroup against a single genome assembly of any  
117 ploidy, which permits representation of gene presence-  
118 absence (PAV) and copy-number (CNV) variation as  
119 physically anchored subgraphs along the reference  
120 genome. We term this resource a ‘pan-genome  
121 annotation’. Since analyses are conducted within syntenic  
122 regions, GENESPACE is agnostic to ploidy, duplicated or  
123 deleted regions, inversions, or other common  
124 chromosomal complexities.

125 As a proof of concept, we compared the GENESPACE  
126 synteny-constrained orthology inference method with  
127 global and sub-genome split OrthoFinder runs using three  
128 allotetraploid cotton genomes (12). These genomes offer  
129 an ideal system to test orthology inference methods due to  
130 their easily identifiable sub-genomes, which resulted from  
131 an ancient 1.0-1.6 million (M) year ago (ya) whole-genome  
132 duplication (WGD), and significant molecular divergence  
133 among genomes (160-630k ya). To determine the  
134 sensitivity of each approach, we calculated the percent of  
135 genes or tandem array representatives captured in  
136 orthogroups that were placed in exactly one syntenic  
137 position on each sub-genome (Supplemental Fig. 2). Given  
138 the known high degree of sequence conservation and little  
139 gene presence-absence variation among these cotton  
140 genomes and sub-genomes (12), most orthogroups should  
141 have six syntenic positions across the three cotton  
142 genomes, each with two sub-genomes. Therefore, the  
143 most accurate method should produce more single-copy  
144 orthogroups with exactly six syntenic positions. Given this  
145 metric, the run where the sub-genomes were split into  
146 separate “species” outperformed the tetraploid run,  
147 recovering 9% more orthogroups present only on  
148 homologous or homeologous chromosomes across all six  
149 sub-genomes. However, GENESPACE’s method to re-run  
150 OrthoFinder on synteny constrained within-block BLAST  
151 hits effectively brought genome-wide single-copy

**Table 1 | Summary of orthogroup (‘OG’) inference for polyploids.**

OrthoFinder was run using default settings on three tetraploid inbred cotton genomes (represented as diploid assemblies) and six split sub-genomes. Counts of single-copy orthogroups (more = better) are presented for nine cotton chromosomes.

|                                | tetraploid | split by subg. | % split better |
|--------------------------------|------------|----------------|----------------|
| n. *global 1x/homeolog OGs --  | 15,280     | 16,804         | 9.1%           |
| n. **synteny-constr. 1x OGs -- | 18,433     | 21,317         | 13.5%          |
| n. ***within-block 1x OGs --   | 21,989     | 21,652         | -1.6%          |

\*\*Global\* orthogroups were parsed directly from the raw orthoFinder (-og) run.

\*\*Synteny-constrained orthogroups are split so that only graph edges within syntenic regions between (sub)genomes are retained. \*\*\*Within block orthogroups are re-calculated from BLAST hits within pairwise syntenic regions.

**Table 2 | Summary of syntenic blocks between *G. barbadense* sub-genomes.**

MCSscanX\_h was run for each subset of BLAST hits and the copy number of each non-overlapping 10kb genomic interval was tabulated from the start/end coordinates of the unique blocks from the collinearity file. The percent of 10kb intervals that are never found within a block (absent), found within exactly one block (single-copy) or in more than one block (multi-copy) are reported.

|                          | % absent* | % single-copy* | % multi-copy* |
|--------------------------|-----------|----------------|---------------|
| Raw BLAST hits --        | 6.5       | 79.5           | 14.0          |
| Collinear array reps. -- | 6.1       | 83.1           | 10.7          |
| OG-constrained --        | 6.1       | 91.3           | 2.6           |
| *GENESPACE default --    | 5.6       | 93.7           | 0.6           |

\*The GENESPACE-calculated block coordinates, which uses MCSscanX.  
\*global % of 10kb intervals in each category.

152 orthogroup inference in line with the sub-genome split  
153 methods (Table 1). These results indicate that, in contrast  
154 to previous approaches, GENESPACE infers homeologs  
155 between polyploid sub-genomes with similar precision as  
156 orthologs among haploid genomes.

157 In addition to improved accuracy and precision of  
158 syntenic orthogroup inference, GENESPACE's method to  
159 find syntenic regions and blocks outperforms collinearity  
160 estimates from the program MCScanX (4), which serves as  
161 an important tool for synteny inference (Table 2). To  
162 demonstrate this improvement, we contrasted the two  
163 sub-genomes of 'Pima' cotton (*Gossypium barbadense*).  
164 The 1-1.6M ya divergence between these sub-genomes  
165 resulted in many minor and several major inversions and  
166 translocations (Supplemental Fig. 2), yet the two genomes  
167 remain nearly completely intact and single-copy, excluding  
168 tandem arrays. Thus, the vast majority of each sub-  
169 genome should correspond to exactly one position in the  
170 alternative sub-genome. To test the performance of  
171 syntenic block calculations, we tabulated the proportion of  
172 10kb genomic intervals in the expected single-copy  
173 dosage or likely erroneous (absent or multi-copy) copy  
174 number for three different BLAST hit subsets piped into  
175 MCScanX and the complete GENESPACE method (Table  
176 2). MCScanX's sensitivity causes non-orthologous blocks  
177 and overlapping block breakpoints to be included at a high

178 rate: 14% of all intervals were multi-copy in the MCScanX  
179 run using raw BLAST hits. However, this issue can be  
180 partially resolved by subsetting the BLAST hits to those  
181 within the same orthogroups (2.6% multi-copy). This  
182 orthogroup constraint performance improvement is the  
183 major motivator for the GENESPACE synteny pipeline,  
184 which uses orthogroup-constrained BLAST hits as the  
185 initial seed for syntenic blocks, then searches all hits within  
186 a fixed radius to these anchors. This second proximity  
187 search step also resulted in significant gains in single-copy  
188 syntenic regions between sub-genomes, simultaneously  
189 reducing the amount of un-represented (6.1% to 5.6%) and  
190 multi-copy (2.6% to 0.6%) sequences. Combined, these  
191 results demonstrate a marked improvement in synteny  
192 discovery and block coordinate assignment.

### 193 Synteny-anchored vertebrate sex chromosomes pan- 194 genome annotations

195 The GENESPACE pan-genome annotation facilitates  
196 the exploration and analysis of sequence evolution across  
197 multiple genomes within regions of interest (ROI). Some  
198 common use applications include the analysis of QTL  
199 intervals (see the next section), or tests of genome  
200 evolution at larger phylogenetic scales. One particularly  
201 instructive example comes from the origin and evolution of  
202 the mammalian XY and avian ZW sex chromosome  
203

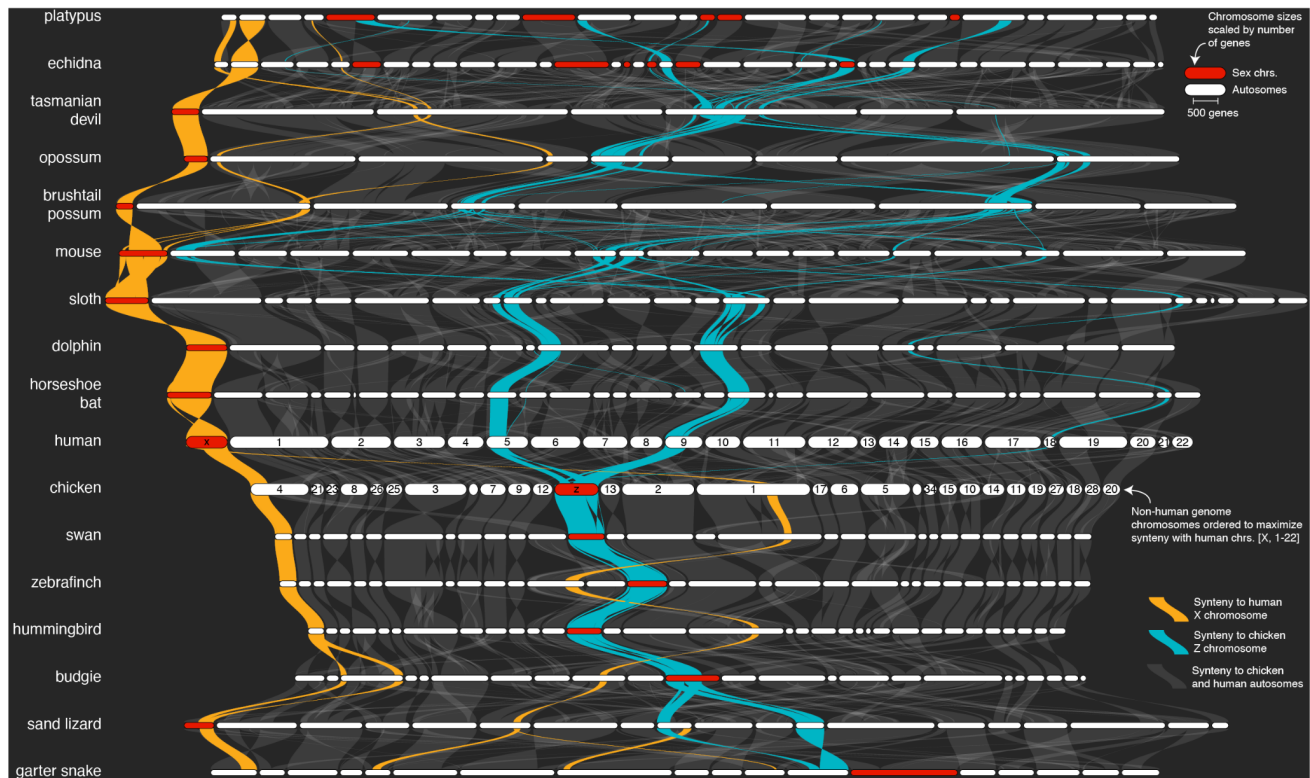

**Fig. 1 | Structural evolution of mammalian X and avian Z sex chromosomes.** The reptilian, avian, and mammalian sex chromosomes syntenic network across 17 representative vertebrate genomes (two reptile, five eutherian mammal, three marsupial, two monotremes, and five avian genomes; see Supplemental Fig. 3 for the full synteny graph including autosomes and chromosome labels). The plot was generated by the GENESPACE function `plot_riparian`. Genomes are ordered vertically to maximize synteny between sequential pairwise genomes. Chromosomes are ordered horizontally to maximize synteny with the human chromosomes [X, Y, 1-22]. Regions containing syntenic orthogroup members to the mammalian X (gold) or avian Z (blue) chromosomes are highlighted. All sex chromosomes are represented by red segments (except the bat chr1, which is most likely the X chromosome but is not represented as such in the assembly), while autosomes are white. Chromosomes are scaled by the total number of genes in syntenic networks and positions of the braids are the gene order along the chromosome sequence.



204 systems. To explore these chromosomes, we ran  
205 GENESPACE on 15 haploid avian and mammalian genome  
206 assemblies (Table 3), spanning most major clades of birds,  
207 placental mammals, monotremes and marsupials with  
208 chromosome-scale annotated reference genomes  
209 (Supplemental Fig. 3, Supplemental Data 1-2). We also  
210 included two reptile genomes as outgroups to the avian  
211 genomes. The heteromorphic chromosomes (Y and W) are  
212 often un-assembled, or, where assemblies exist, lack  
213 sufficient synteny to provide a useful metric for  
214 comparative genomics. As such, we chose to focus on the  
215 homomorphic X and Z chromosomes, which have  
216 remained surprisingly intact over the >100M years of  
217 independent mammalian (13) and avian evolution (14) (Fig.  
218 1).

219 While the same or similar genomic regions often  
220 recurrently evolve into sex chromosomes, perhaps due to  
221 ancestral gene functions involved in gonadogenesis,  
222 evidence about the non-randomness of sex chromosome  
223 evolution is still contentious (15). Given our analysis, it is  
224 clear that the avian Z chromosome did not evolve from  
225 either of the two reptile Z chromosomes sampled here, but  
226 instead likely arose from autosomal regions or unsampled  
227 ancestral sex chromosomes. The situation in mammals is  
228 less clear, in part because both reptile genomes are more  
229 closely related to avian than mammalian genomes, which  
230 makes ancestral state reconstructions between the two  
231 groups less accurate. Nonetheless, the mammalian X and  
232 sand lizard Z chromosomes partially share syntenic  
233 orthology, an outcome that would be consistent with  
234 common descent from a shared ancestral sex  
235 chromosome or autosome containing sex-related genes.  
236 The shared 91.7M bp region between the human X and  
237 sand lizard Z represents 59.0% of the human X  
238 chromosome genic sequence. The remaining 64.0M bp of  
239 human X linked sequence are syntenic with autosomes 4  
240 (9.9M bp) and 16 (119.6M bp) in sand lizard. The same  
241 region is syntenic across three autosomes in the garter  
242 snake genome (Fig. 1, Supplemental Data 3).

243 The eutherian mammalian X chromosome is largely  
244 composed of two regions, an X-conserved ancestral sex  
245 chromosome region that arose in the common ancestor of  
246 therian mammals, and an X-added region that arose in the  
247 common ancestor of eutherians (16). Consistent with this  
248 evolutionary history, the X chromosome is syntenic across  
249 all five eutherian mammals studied here. Further, a 107.2M  
250 bp (68.8%) segment of the human X, which corresponds  
251 with the X-conserved region, is syntenic with 77.8M bp  
252 (93.9%) of the tasmanian devil X chromosome and  
253 represents the entire syntenic region between the human  
254 and all three marsupial X chromosomes (Fig. 1).

255 Similarly, the chicken Z chromosome is retained in its  
256 entirety across all five avian genomes. The only notable  
257 exception being the budgie Z chromosome, which also  
258 features a partial fusion between the Z and an otherwise  
259 autosomal 19.5M bp segment of chicken chromosome 11  
260 (Fig. 1, Supplemental Data 3), potentially representing a  
261 neo-sex chromosome fusion that has not yet been  
262 described.

263 In contrast to conserved eutherian and avian sex  
264 chromosomes, the complex monotreme  $X_nY_n$  sex  
265 chromosomes are only partially syntenic between the two  
266 sampled genomes. Only the first X chromosomes are  
267 ancestral to both echidna and platypus (17), and all are  
268 unrelated to the mammalian X chromosomes (Fig. 1,  
269 Supplemental Fig. 3), consistent with their independent  
270 evolution (17). Interestingly, the entirety of the echidna X4  
271 and 47.6M bp (67.9%) of the genic region of the platypus  
272 X5 chromosomes are syntenic with the avian Z  
273 chromosome (Fig. 1). The phylogenetic scale of the  
274 genomes presented here precludes evolutionary inference  
275 about the origin of these shared sex chromosome  
276 sequences; however, the possibility of parallel evolution of  
277 sex chromosomes between such diverged lineages may  
278 prove an interesting future line of inquiry.

### 280 Exploiting synteny to track candidate genes in grasses

281 The Poaceae grass plant family is one of the best studied  
282 lineages of all multicellular eukaryotes and includes  
283 experimental model species (*Brachypodium distachyon*;  
284 *Panicum hallii*; *Setaria viridis*) and many of the most  
285 productive (*Zea mays*- maize/corn; *Triticum aestivum* -  
286 wheat, *Oryza sativa* - rice) and emerging (*Sorghum bicolor*  
287 - sorghum; *P. virgatum* - switchgrass) agricultural crops.  
288 Despite the tremendous genetic resources of these and  
289 other grasses, genomic comparisons among grasses are  
290 difficult, in part because of an ancient polyploid origin (see  
291 the next section), and because subsequent whole-genome  
292 duplications are a feature of most clades of grasses. For  
293 example, maize is an 11.4M ya paleo-polyploid (18), allo-  
294 tetraploid switchgrass formed 4-6M ya (19), and allo-  
295 hexaploid bread wheat arose about 8k ya (20). In some  
296 cases, homeologous gene duplications from polyploidy  
297 have generated genetic diversity that can be targeted for  
298 crop improvement; however, in other cases the genetic  
299 basis of trait variation may be restricted to sequences that  
300 arose in a single sub-genome. Thus, it is crucial to  
301 contextualize comparative-quantitative genomics  
302 searches and explicitly explore only the orthologous or  
303 homeologous regions of interest when searching for  
304 markers or candidate genes underlying heritable trait  
305 variation — a significant challenge in the complex and  
306 polyploid grass genomes. To help overcome this challenge  
307 and provide tools for grass comparative genomics, we  
308 conducted a GENESPACE run and built an interactive  
309 viewer hosted on Phytozome (21) among genome  
310 annotations for the eight grass species listed above. Owing  
311 to its use of within-block orthology and synteny  
312 constraints, GENESPACE is ideally suited to conduct  
313 comparisons across species with diverse polyploidy  
314 events. Default parameters produced a largely contiguous  
315 map of synteny even across notoriously difficult  
316 comparisons like the paleo homeologs between the maize  
317 sub-genomes (Fig. 2a, Supplemental Fig. 4, Supplemental  
318 Data 4). Furthermore, the sensitive synteny construction  
319 pipeline implemented by GENESPACE effectively masks  
320 additional paralogous regions like those from the *Rho*



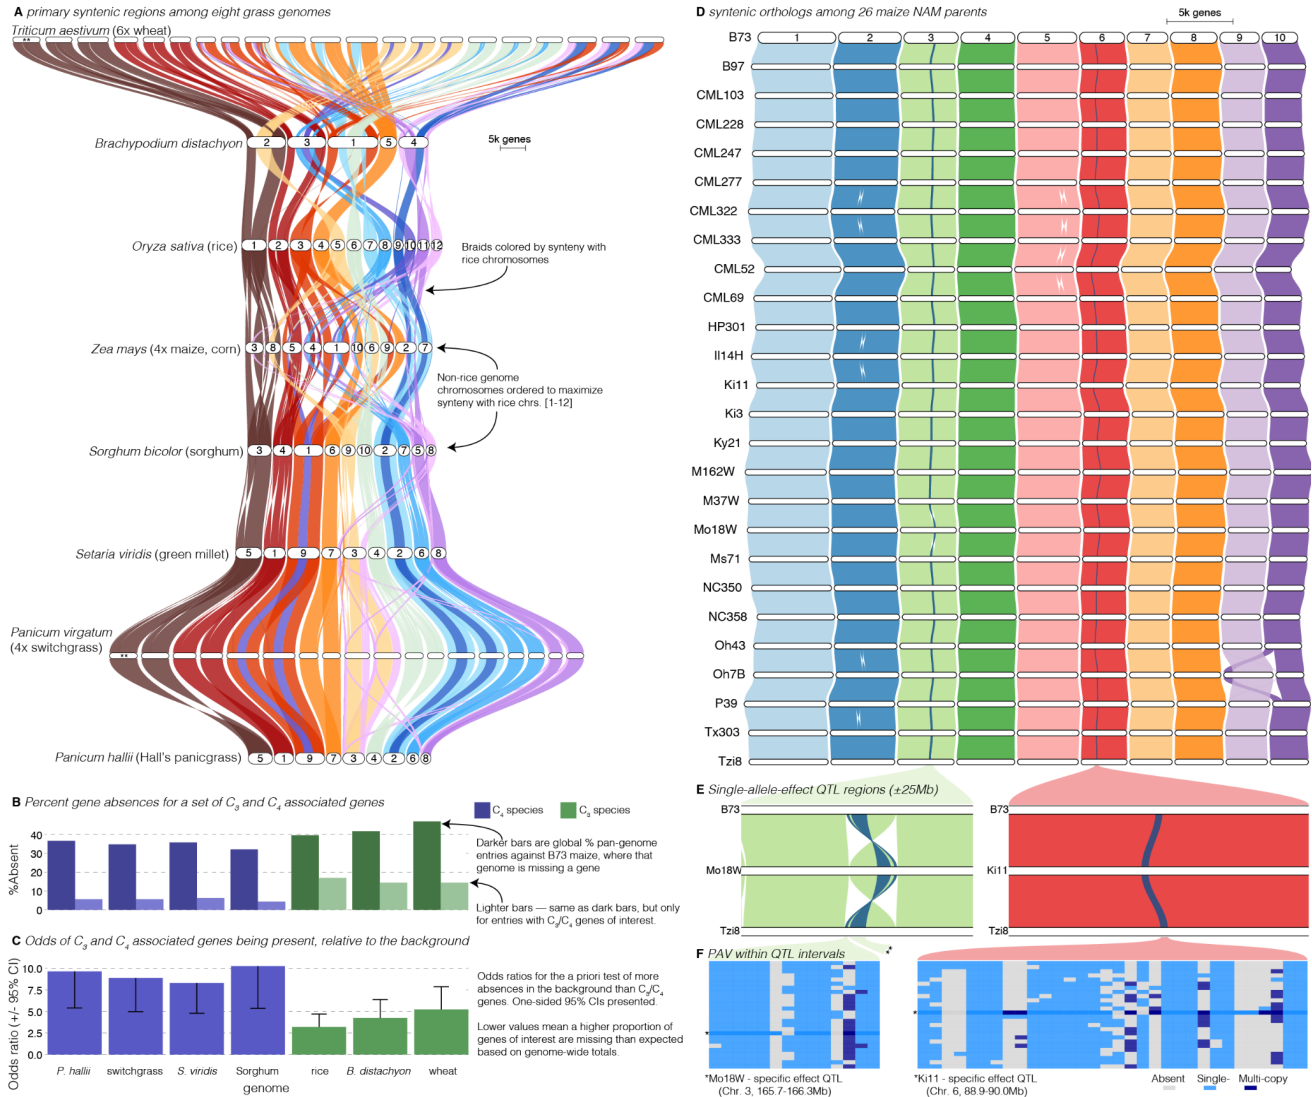

**Fig. 2 | Comparative-quantitative genomics in the grasses.** **A** The GENESPACE syntenic map ("riparian plot") of orthologous regions among eight grass genomes. Chromosomes are ordered to maximize synteny with rice and ribbons are color-coded by synteny to rice chromosomes. Chromosome names are too long to fit for the neo-polyploids (\*\*); Supplemental Figure 4 contains names of all chromosomes. **B** The upper bars display the proportion of maize genome models without syntenic orthologs ("absent") in each genome, split by the full background (dark colors) and 86 genes annotated for roles in the evolution of  $C_3/C_4$  photosynthesis. **C** The proportion of absent genes is higher in the  $C_3$  genomes (green bars), even when controlling for more global gene absences (lower odds ratios). **D** Syntenic orthologs, controlling for homeologs among the 26 maize NAM founder genomes, with two general QTL intervals highlighted. **E** Focal QTL regions that affect productivity in drought where only the genome that drives the QTL effect (middle genome); the top (B73) and bottom (Tz18) genomes are presented and the region plotted is restricted to the 50Mb physical B73 interval surrounding the QTL. Note that the chr3 QTL disarticulates into two intervals. Due to a larger number of potential candidate genes, the larger chr3 region, flagged with \*\*, is explored separately in Supplemental Figure 6. **F** Presence-absence and copy number variation are presented for two of the three intervals. The focal genome is flagged \* and its corresponding map colors are more saturated.

321 duplication that gave rise to all extant grasses (but see 333  
 322 below). 334  
 323 Breeders and molecular biologists can take two general 335  
 324 approaches to understanding the genetic basis of complex 336  
 325 traits: studying variation caused by a priori-defined genes 337  
 326 of interest, or determining candidate genes from genomic 338  
 327 regions of interest. As an example of the exploration of lists 339  
 328 of a priori-defined candidate genes, we analyzed the 340  
 329 functional and presence-absence variation of 86 genes 341  
 330 shown to be involved in the transition between  $C_3$  and  $C_4$  342  
 331 photosynthesis (22), the latter permitting ecological 343  
 332 dominance in arid climates and agricultural productivity 344

under forecasted increased heat load of the next century. To conduct this analysis, we built pan-genome annotations across the seven grasses anchored to  $C_4$  maize (Supplemental Data 5), which was the genome in which these genes were discovered. This resulted in 159 pan-genome entries; nearly always two placements for each gene in the paleo-tetraploid maize genome. Given that many of these genes were discovered in part because of sequence similarity to genes in *Arabidopsis* and other diverged plant species, it is not surprising that PAV among  $C_3/C_4$  genes was lower than the background (9.7% vs 38.2%, odds = 5.7,  $P < 1 \times 10^{-16}$ ; Fig. 2b). However, these

345 ratios were highly variable among genomes, particularly  
346 among the C<sub>3</sub> species (wheat, rice, *B. distachyon*), which  
347 had far higher percent absences than the C<sub>4</sub> species  
348 (15.3% vs. 5.5%, odds = 3.1,  $P = 6.25 \times 10^{-9}$ , Fig. 2b). This  
349 effect is undoubtedly due in part to the increased  
350 evolutionary distance between maize and the C<sub>3</sub> species  
351 compared to the other C<sub>4</sub> species. However, when  
352 controlling for the elevated level of absent genes globally  
353 in C<sub>3</sub> species, the effect was still very strong: the odds of  
354 C<sub>3</sub> species having more of these C<sub>3</sub>/C<sub>4</sub> genes at syntenic  
355 pan-genome positions than the background was always  
356 lower than the C<sub>4</sub> species (Fig. 2c). Despite these  
357 interesting patterns, given only a single C<sub>3</sub>/C<sub>4</sub> phylogenetic  
358 split in this dataset, it is impossible to test evolutionary  
359 hypotheses regarding the causes of such PAV.  
360 Nonetheless, this result suggests a possible role of gene  
361 loss or gain as an evolutionary mechanism for drought- and  
362 heat-adapted photosynthesis.

363 Like the exploration of *a priori*-defined sets of genes,  
364 finding candidate genes within quantitative trait loci (QTL)  
365 intervals usually involves querying a single reference  
366 genome and extracting genes with promising annotations  
367 or putatively functional polymorphism. In the case of a  
368 biparental mapping population genotyped against a single  
369 reference, this is a fairly trivial process where genes within  
370 physical bounds of a QTL are the candidates. However,  
371 many genetic mapping populations now have reference  
372 genome sequences for all parents; this offers an  
373 opportunity to explore variation among functional alleles  
374 and presence absence variation, which would be  
375 impossible with a single reference genome. GENESPACE  
376 is ideally suited for this type of exploration, and indeed was  
377 originally designed to solve this problem between the two  
378 *P. hallii* reference genomes and their F<sub>2</sub> progeny (9) using  
379 synteny to project the positions of genes across multiple  
380 genomes onto the physical positions of a reference.

381 To illustrate this approach, we re-analyzed QTL  
382 generated from the 26-parent USA maize nested  
383 association mapping (NAM) population (23). Originally,  
384 candidates for these QTL were defined by the proximate  
385 gene models only in the B73 reference genome (23);  
386 however, with GENESPACE and the recently released  
387 NAM parent genomes (24), it is now possible to evaluate  
388 candidate genes present in the genomes of other NAM  
389 founder lines but either absent or unannotated in the B73  
390 reference genome. We built a single-copy synteny graph of  
391 all 26 NAM founders, anchored to the B73 genome to  
392 explore this possibility (Fig. 2d; Supplemental Data 6;  
393 Supplemental Fig. 5) and extracted the three QTL intervals  
394 (Fig. 2d-e) where the allelic effect of a single parental  
395 genome was an outlier relative to all other alleles. Such  
396 'private' allelic contributions, which may be driven by  
397 parent-specific sequence variation, were manifest here as  
398 delayed period of silking-anthesis of progeny with the  
399 Mo18W allele at two adjacent Chr3 QTLs and reduced  
400 plant height under drought for progeny with the Ki11 allele  
401 at the Chr6 QTL (23). Given that these QTL were chosen  
402 only due to their parental allelic effects, we were surprised  
403 to find that the two Mo18W QTL regions exist within a  
404 11.7M bp derived inversion that is only found in the Mo18W

405 genome (Fig. 3d-e). Since inversions reduce  
406 recombination, it is possible that multiple Mo18W causal  
407 variants have been fixed in linkage disequilibrium in this  
408 NAM population. In addition to this chromosomal mutation  
409 and sequence variation between the parents and B73 (23),  
410 we sought to define additional candidate genes from the  
411 patterns of presence-absence and copy-number variation,  
412 explicitly looking for genes that were private to the focal  
413 genome. Two genes in the smaller chr3 and one gene in  
414 the larger chr3 interval were private to Mo18W and four  
415 genes in three pangenome entries (one two-member array)  
416 were private to Ki11 in the chr6 interval (Fig. 2f,  
417 Supplemental Fig. 6, Supplemental Data 7). While none of  
418 these genes have functional annotations relating to  
419 drought, this method provides additional candidates that  
420 would not have been discovered by B73-only candidate  
421 gene exploration.

### 422 **Studying the whole-genome duplication that led to the** 423 **diversification of the grasses**

424 Like most plant families (25–27), but unlike nearly all  
425 animal lineages (28), the grasses radiated following a  
426 whole-genome duplication: the ~70M ya *Rho* WGD. The  
427 resulting gene family redundancy and gene-function sub-  
428 functionalization is hypothesized to underlie the  
429 tremendous ecological and morphological diversity of  
430 grasses (29–31). To explore sequence variation among  
431 *Rho*-derived paralogs, we used GENESPACE to build a  
432 ploidy-aware syntenic pan-genome annotation among  
433 these eight species (Supplemental Data 8), using the built-  
434 in functionality that allows the user to mask primary (likely  
435 orthologous) syntenic regions and search for secondary  
436 hits (likely paralogous, Fig. 3a). Overall, the peptide identity  
437 between *Rho*-derived paralogous regions was much lower  
438 than orthologs among species (e.g. *S. viridis* vs. *P. hallii*:  
439 Wilcoxon  $W = 88094632$ ,  $P < 10^{-16}$ ; Supplemental Data 9),  
440 consistent with the previous discovery that the *Rho*  
441 duplication predated the split among most extant grasses  
442 by >20M years (32). However, as has been previously  
443 observed, there is significant variation in the relative  
444 similarity of *Rho*-duplicated chromosome pairs (33). As an  
445 example, the peptide sequences of single-copy gene hits  
446 in primary syntenic regions (median identity = 90.6%)  
447 between chromosome 8 of *P. hallii* and *S. viridis*, were  
448 26.9% more similar than the secondary *Rho*-derived  
449 regions (median identity = 71.4%, Wilcoxon  $W = 87842$ ,  $P$   
450  $< 10^{-16}$ ). However, *S. viridis* chromosome 8 contained a  
451 single paralogous region between all seven grass genomes  
452 that could not be distinguished from the primary regions,  
453 based on synteny or orthogroup identity. Unlike all other  
454 *Rho*-derived blocks, the *P. hallii* paralogs to this 2.7M bp  
455 chromosome 8 region were not significantly less conserved  
456 than the primary orthologous region (91.6% vs. 91.9%,  $W$   
457  $= 14830$ ,  $P = 0.13$ ). Outside of this region, the peptide  
458 identity of paralogs dropped back to the genome-wide  
459 average (Fig. 3b).

460 Indeed, the GENESPACE run treating the eight  
461 genomes as haploid representations could not distinguish  
462 between the *Rho* derived paralogs in the over-retained  
463

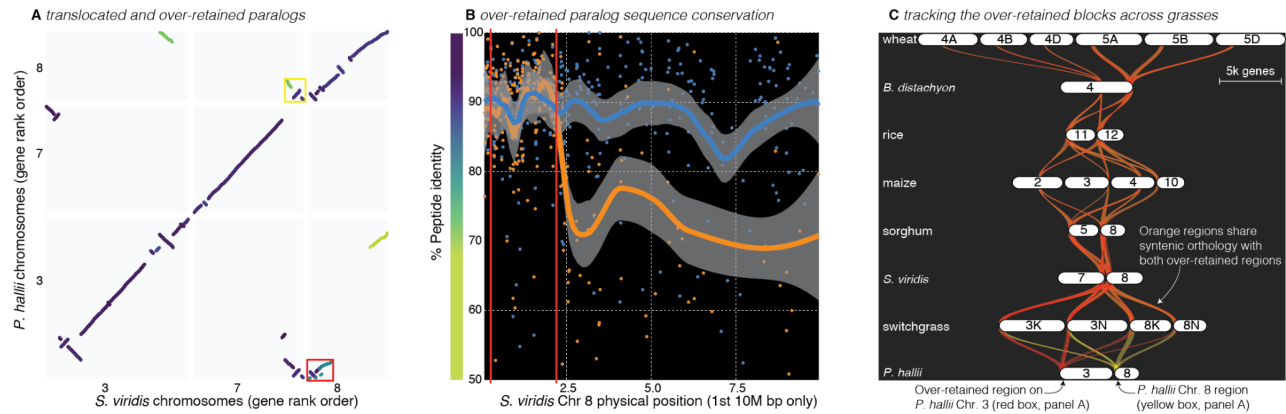

**Fig. 3 | Analysis of the grass *Rho* WGD.** **A** Syntenic anchor blast hits where the target and query genes were in the same orthogroup between *P. hallii* and *S. viridis* genomes. The color of each point indicates the peptide identity of each pair of sequences; the color scale is shown along the y axis of panel B. **B** The protein identity of *S. viridis* chromosome 8 primary orthologous (blue line) hits against *P. hallii* chromosome 8 and the secondary hits (orange line) against *P. hallii* chromosome 3 demonstrate sequence conservation heterogeneity. The region between the two red vertical lines corresponds to the red-boxed over-retained primary block in panel A. **C** The two boxed regions in panel A were tracked from their origin on *P. hallii* chromosome 3 (red) and 8 (yellow). Note that all syntenic orthologous regions across the graph contain both *P. hallii* source regions (50% transparency of the braids - overlapping regions appear orange).

464 region across all grasses (Fig. 3c), with the exception of all  
 465 chromosome pairs between *B. distachyon* and wheat and  
 466 blocks connecting Maize chromosome 10 to sorghum  
 467 chromosome 5. It is interesting to note that all syntenic  
 468 over-retained regions are at the extreme terminus of the  
 469 chromosomes outside of maize, *B. distachyon* and wheat;  
 470 further, the only genome with complete segregation of the  
 471 two paralogs, wheat, also retains these regions in the  
 472 center of all six chromosomes (Fig. 3c). These results are  
 473 consistent with the proposed evolutionary mechanism (33)  
 474 where concerted evolution and “illegitimate” homeologous  
 475 recombination may have homogenized these paralogous  
 476 regions. This process would be less effective in  
 477 pericentromeric regions than the chromosome tails, where  
 478 a single crossover event would be sufficient to homogenize  
 479 two paralogous regions that arose 70M ya.

## 481 Conclusions

482 Combined, the historical abundance of genetic  
 483 mapping studies and ongoing proliferation of genome  
 484 resources provides a strong foundation for the integration  
 485 of comparative and quantitative genomics to accelerate  
 486 discoveries in evolutionary biology, medicine, and  
 487 agriculture. The incorporation of synteny and orthology into  
 488 comparative genomics and quantitative genetics pipelines  
 489 offers a mechanism to bridge these disparate disciplines.  
 490 Here, we presented the GENESPACE R package and the  
 491 syntenic pan-genome annotation as a framework to help  
 492 bridge the current gaps between comparative and  
 493 quantitative genomics, especially in complex evolutionary  
 494 systems. We hope that the examples presented here will  
 495 inspire further work to leverage the powerful genome-wide  
 496 annotations that are coming online, both within and among  
 497 species.

## 498 METHODS

500 All analyses were performed in R 4.1.2 on macOS Big Sur 10.16.  
 501 The following R packages were used either for visualization or within  
 502 GENESPACE v0.9.3 (11-February 2022 release): data.table v1.14.0

503 (42), dbscan v1.1-8 (43), igraph v1.2.6 (44), Biostrings v2.58.0 (45),  
 504 rtracklayer v1.50.0 (46). GENESPACE also calls the following third  
 505 party software: diamond v2.0.8.146 (47), OrthoFinder v2.5.4 (1), and  
 506 MCScanX no version installed on 10/23/2020 (4).

507 All results, tables (except Table 3), figures (except Fig. S1) and  
 508 statistics were generated programmatically; the accompanying scripts  
 509 and key output are available on github: jtlovel/GENESPACE\_data.  
 510 Minor adjustments to figures to improve clarity were accomplished in  
 511 Adobe Illustrator v26.01. Below, we provide a high-level description of  
 512 the GENESPACE pipeline and the methods to produce the results  
 513 presented here. A full description of each step in GENESPACE is  
 514 provided in the documentation that accompanies the package source  
 515 code on github (jtlovel/GENESPACE).

## 516 Description of the vignettes

517 Raw genome annotations were downloaded on or before 8-  
 518 October 2021. See Table 3 for data sources, citations and metadata.  
 519 For the analyses presented here, we conducted six GENESPACE runs:  
 520 cotton tetraploid, cotton sub-genome-split, vertebrates, grasses,  
 521 grass *Rho* duplication, and maize 26 NAM parents.

522 All GENESPACE runs used default parameterization, with the  
 523 following exceptions: (1) both cotton runs used a minimum block size  
 524 and maximum number of gaps of 10 (default = 5 for both), (2) the *Rho*  
 525 grass run allowed a single secondary hit (default is 0, this is how the  
 526 paralogs are explicitly searched for) and maximum number of gaps in  
 527 secondary regions of 10 (default is 5, relaxed to reduce ancient  
 528 paralogous block splitting), and (3) the maize run used the “fast”  
 529 OrthoFinder method since all genomes are closely related and haploid.  
 530 Some maize genomes contain small alternative haplotype scaffolds,  
 531 which were dropped for all analyses.

532 The cotton runs employed the GENESPACE “outgroup”  
 533 functionality, which allows the user to specify a genome that is  
 534 included in the seed OrthoFinder run, but is ignored for all synteny and  
 535 pan-genome construction steps. This can be important when dealing  
 536 with highly diverged species that do not share complete synteny, but  
 537 are needed for accurate orthogroup inference. For example, a run with  
 538 only the three cotton genomes would be likely to split sub-genome  
 539 orthogroups since the WGD predated speciation. As such, we included  
 540 *Theobroma cacao* (48) as an outgroup.

541 The publicly available C/C. gene lists and QTL intervals were  
 542 generated against the v2 maize assembly. To make this comparable to  
 543 the across-grass and NAM parent GENESPACE runs, we also  
 544 accomplished a fast GENESPACE run between v2 and the two v5  
 545 versions used here. The orthologs and syntenic mapping between  
 546 these versions are included as text files in the data repository.

547 Statistics presented here were all calculated within R. To compare  
 548 non-normal distributions (e.g. sequence identity), we used the non-



**Table 3 | Raw data sources. A list of the genomes used in analyses here.** Genome version IDs are taken from those posted on the respective data sources and may not reflect the name of the genome in the publication. Where multiple haplotypes are available, only the primary was used for these analyses. All polyploids presented here have only a primary haplotype assembled into chromosomes.

| ID              | Species                                  | Genome version      | Data source | Ploidy* | Reference                                                                       |
|-----------------|------------------------------------------|---------------------|-------------|---------|---------------------------------------------------------------------------------|
| garterSnake     | <i>Thamnophis elegans</i>                | rThaEle1.pri        | NCBI        | 1       | (11)                                                                            |
| sandLizard      | <i>Lacerta agilis</i>                    | rLacAgi1.pri        | NCBI        | 1       | (11)                                                                            |
| chicken         | <i>Gallus gallus</i>                     | mat.broiler.GRCg7b  | NCBI        | 1       | <a href="https://www.ncbi.nlm.nih.gov/grc">https://www.ncbi.nlm.nih.gov/grc</a> |
| hummingbird     | <i>Calypte anna</i>                      | bCalAnn1_v1.p       | NCBI        | 1       | (11)                                                                            |
| budgie          | <i>Melopsittacus undulatus</i>           | bMelUnd1.mat.Z      | NCBI        | 1       | Unpublished VGP                                                                 |
| swan            | <i>Cygnus olor</i>                       | bCygOlo1.pri.v2     | NCBI        | 1       | (11)                                                                            |
| zebraFinch      | <i>Taeniopygia guttata</i>               | bTaeGut1.4.pri      | NCBI        | 1       | (11)                                                                            |
| echidna         | <i>Tachyglossus aculeatus</i>            | mTacAcu1.pri        | NCBI        | 1       | (34)                                                                            |
| platypus        | <i>Ornithorhynchus anatinus</i>          | mOrnAna1.pri.v4     | NCBI        | 1       | (34)                                                                            |
| brushtailPossum | <i>Trichosurus vulpecula</i>             | mmTriVul1.pri       | NCBI        | 1       | (11)                                                                            |
| opossum         | <i>Monodelphis domestica</i>             | MonDom5             | NCBI        | 1       | (35)                                                                            |
| tasmanianDevil  | <i>Sarcophilus harrisii</i>              | mSarHar1.11         | NCBI        | 1       | (11)                                                                            |
| human           | <i>Homo sapiens</i>                      | GRCh38.p13          | NCBI        | 1       | <a href="https://www.ncbi.nlm.nih.gov/grc">https://www.ncbi.nlm.nih.gov/grc</a> |
| mouse           | <i>Mus musculus</i>                      | GRCm39              | NCBI        | 1       | <a href="https://www.ncbi.nlm.nih.gov/grc">https://www.ncbi.nlm.nih.gov/grc</a> |
| dog             | <i>Canis lupus familiaris</i>            | Dog10K_Boxer_Tasha  | NCBI        | 1       | (36)                                                                            |
| sloth           | <i>Choloepus didactylus</i>              | mChoDid1.pri        | NCBI        | 1       | (11)                                                                            |
| horseshoeBat    | <i>Rhinolophus ferrumequinum</i>         | mRhiFer1_v1.p       | NCBI        | 1       | (11)                                                                            |
| dolphin         | <i>Tursiops truncatus</i>                | mTurTru1.mat.Y      | NCBI        | 1       | Unpublished VGP                                                                 |
| Phallii         | <i>Panicum hallii</i> var. <i>hallii</i> | HAL2_v2.1           | Phytozome   | 1       | (9)                                                                             |
| switchgrass     | <i>Panicum virgatum</i>                  | AP13_v5.1           | Phytozome   | 2       | (19)                                                                            |
| Sviridis        | <i>Setaria viridis</i>                   | v2.1                | Phytozome   | 1       | (37)                                                                            |
| Sorghum         | <i>Sorghum bicolor</i>                   | BTx623_v3.1         | Phytozome   | 1       | (38)                                                                            |
| maize           | <i>Zea mays</i>                          | B73_refgen_v5       | NCBI        | *2      | (24)                                                                            |
| rice            | <i>Oryza sativa</i> cv 'kitaake'         | kitaake_v2.1        | Phytozome   | 1       | (39)                                                                            |
| brachy          | <i>Brachypodium distachyon</i>           | Bd21_v3.1           | Phytozome   | 1       | (40)                                                                            |
| wheat           | <i>Triticum aestivum</i>                 | V4 (Chinese Spring) | NCBI        | 3       | (41)                                                                            |
| Gbarbadense     | <i>Gossypium barbadense</i>              | v1.1                | Phytozome   | 2       | (12)                                                                            |
| Gdarwinii       | <i>Gossypium darwinii</i>                | v1.1                | Phytozome   | 2       | (12)                                                                            |
| Gtomentosum     | <i>Gossypium tomentosum</i>              | v1.1                | Phytozome   | 2       | (12)                                                                            |
| 26 NAM parents  | <i>Zea mays</i>                          | see data on NCBI    | NCBI        | *1      | (24)                                                                            |

\*Ploidy indicates how the genome was treated in the analyses. All values match the ploidy of the primary assembly haplotype except maize, where the refgen\_v5 was treated as diploid (to match both homeologs) in the multi-species run, but as haploid in the NAM founder population to track only meiotic homologs across the population. This parameterization is to match the phylogenetic position of the WGD in the terminal branch of the grass-wide analysis, but ancestral in the 26-NAM analysis.

parametric signed Wilcoxon ranked sum test. To measure sequence divergence, we conducted pairwise peptide alignments via Needleman-Wunsch global alignment, implemented in the Biostrings (45) function, pairwiseAlignment. We then used this alignment to calculate the percent peptide sequence identity between the un-gapped aligned regions for any two single-copy anchor hits using the Biostrings function pid with the type2 method. To determine single outliers from a unimodal distribution, we applied the Grubbs test implemented in the outliers R package (49). Some figures were constructed outside of GENESPACE using base R plotting routines and ggplot2 v3.3.3 (50). Some color palettes were chosen with RColorBrewer (51) and viridis (52).

### GENESPACE pipeline: Running orthofinder within R

GENESPACE operates on gff3-formatted annotation files and accompanying peptide fasta files for primary gene models. There are convenience functions for re-formatting the gff and peptide files to simplify the naming scheme and reduce redundant gene models to the primary longest transcript. With these data in hand OrthoFinder (7) is run on the parsed primary peptide files. While the default behavior of GENESPACE is to run OrthoFinder using its default parameters (diamond2 --more-sensitive), GENESPACE also offers a 'fast' method that performs only one-way diamond2 (47) searches, where the genome annotation with more gene models serves as the query and the smaller annotation is the target. The diamond BLAST-like (hereon 'BLAST') results are mirrored and each are stored as OrthoFinder-formatted blast8 text files. OrthoFinder is then run to the orthogroup-formating step (-og) on the pre-computed BLAST text files. This

method results in significant speed improvements with little loss of fidelity among closely-related haploid genomes (Table 4).

There are two methods to infer orthogroups; the original (-og) method clusters genes and builds an undirected cyclic graph from closely related genes bases on BLAST scores (2), while hierarchical phylogenetic orthogroups can disarticulate the clustered orthogroups based on gene trees (1). The latter approach may more effectively exclude paralogs from orthogroups (Supplemental Table 1). Finally, orthofinder infers pairwise orthologs as directed acyclic graphs from one genome to each other (1). The orthologs represent the most strict definition of orthology and are based on gene trees. GENESPACE attempts to merge the benefits of each of these methods by first, only considering -og orthogroups for synteny, which allows users to optionally include paralogs in the scan. If hierarchical orthogroups were used instead, a dramatic decrease in homeologous gene discovery would be expected. To take advantage of the more advanced orthofinder methods, GENESPACE includes non-syntenic gene tree-inferred orthologs into the pan-genome annotation during its final steps (see below).

Orthofinder defines orthogroups as *the set of genes that are descended from a single gene in the last common ancestor of all the species being considered*. As such, the scale of the orthofinder run matters, often significantly. For example, an orthogroup would not be likely to contain homeologs across the two ancient sub-genomes for an orthofinder run that included only two maize genomes — since the coalescence of any two maize genotypes occurred well before the ~12M ya whole genome duplication, few homeologs would both be descended from the same common ancestor when considering only

maize genotypes. This is why the within-maize NAM parent run (Fig. 2d) excludes homeologs. However, if an outgroup to maize is included in the orthofinder run, both maize homeologs would be likely to show common ancestry to a single gene in the outgroup, thus connecting the maize homeologs into a single orthogroup. This is why both maize homeologous regions are present in the across-grasses synteny graph (Fig. 2a) despite using identical parameters to the maize NAM parent run. Given the potentially significant role of outgroups on the results of the global orthofinder run (Supplemental Table 1), GENESPACE offers an “outgroup” parameters, which specifies which of the genomes should be included in the orthofinder run, but excluded for all downstream analyses.

### GENESPACE pipeline: Build syntenic orthogroup graphs

Syntenic regions are extracted from BLAST hit files with graph- and cluster-based approaches using a set of user-defined parameters. While these parameters allow for flexibility, the defaults are sufficient for most high-quality genomes and evolutionary scenarios; for example, we used the same default parameters for 300M years of vertebrate evolution, 65M years and multiple WGDs of grasses, and 10k years of Maize divergence. For a full list of parameters, see documentation of the `set_syntenyParams` GENESPACE function, but here, we will discuss the (1) the minimum number of unique hits within a syntenic block (`'blkSize'`, default = 5), (2) the maximum number of gaps within a block alignment (`'nGaps'`, default = 5), and (3) the radius around a syntenic anchor for a hit to be considered syntenic (`'synBuff'`, default = 100).

Prior to pairwise synteny searches, ‘collinear arrays’ are defined for each genome as groups of genes separated by no more than `synBuff` genes on the same chromosome that share an orthogroup. For each collinear array, the single physically most central gene is flagged as the ‘array representative’. Only the array representatives can be syntenic anchors (see below); this culling produces more accurate block coordinates in regions with large tandem arrays (Table 2) and substantial speed improvements in highly repetitive genomes.

**Table 4 | Comparison of GENESPACE setting performance.** The mirrored ‘fast’ method significantly speeds up orthofinder runs by calling diamond blastp --fast on each non-redundant pairwise combination of genomes. However, this approach is less sensitive than the default performance and is suggested for only closely-related haploid genomes, as the recall of 2:2:2 OGs is slightly less sensitive than the default specification.

|                     | Default orthofinder | GENESPACE ‘fast’ |
|---------------------|---------------------|------------------|
| n. 1:1:1 OGs        | 22,050              | 22,444           |
| n. 2:2:2 OGs        | 13,793              | 13,511           |
| n. tandem arrays    | 10,597 (4433)       | 10,599 (4426)    |
| *Run time (minutes) | 59.95               | 12.45            |

\*Run time is for ortholog/orthogroup inference, not the GENESPACE pipeline as a whole, using the three unsplit cotton genomes, running on 6 2Gb cores.

For each pairwise combination of genomes, synteny is inferred in three steps: (1) the potential syntenic anchor hits are extracted as the top n hits for each array representative gene (where n is the expected ploidy of the alternate genome); (2) collinear anchors are defined by MCScanX; (3) hits within a buffer radius of the collinear anchors are extracted by dbscan. For intra-genomic searches within a haploid genome, synteny is simply defined as the region within the `synBuff` of self hits. Intra-genomic searches within polyploids (or outbred diploids) are more complicated, as self-hits will cause non-self regions to appear highly broken up. To resolve this issue, the self-hit regions are masked and syntenic regions are calculated on the non-self space following the method for inter-genomic synteny. Syntenic orthogroups, which are initially defined as synteny-constrained global orthogroups, can be updated to include re-calculated within-block orthogroups. This step is computationally intensive and yields significantly improved results only when one or more of the genomes are not haploid (Table 1). As such, the default behavior of GENESPACE is to only run within-block OrthoFinder when any of the genomes have diploid or higher ploidy.

### GENESPACE pipeline: Constructing pan-genome annotations

Pairwise syntenic orthologs are decoded into a multi-genome pan-annotation, which is represented by a text file containing the expected

position of all syntenic orthologs across all genomes. This dataset is built in three steps: First, a reference pan-genome annotation is built for all syntenic orthogroups that include a hit in the user-specified reference genome, producing a syntenic-aware database that represents each directed subgraph containing a reference genome gene across all genomes. Second, the expected physical position of all genes are interpolated from the syntenic block anchor hits and orthogroups missing from the reference pan-genome annotation are added accordingly, which permits inference of presence-absence variation within a physical position. These interpolated positions are integrated into the pan-genome annotation where each subgraph in the pan-genome is checked as to whether it has a representative anchored in the reference pan-genome. Third, non-syntenic orthologs are extracted from the raw orthofinder run and added to the pan-genome annotation. The reference pan-genome contains all syntenic orthogroup hits connected by a directed acyclic graph to a reference gene. However, there are many cases where the reference gene in this graph is not the only mapping to the reference. For example, polyploids should have multiple positions. As such, we need to cluster the reference positions of all genes in all subgraphs to ensure that all syntenic positions and PAV are captured accurately.

## FOOTNOTES

### Acknowledgements

The GENESPACE pipeline has been improved by advice and testing by A. Healey, N. Walden, V. Markham, R. Walstead, S. Carey, L. Smith, J. Vogel, J. Willis, J. Jenkins, T. Juenger and many others. Thanks to J. Schnable, J. Leebens-Mack, J.G. Monroe, C.H. Li, R. Tarvin, and M. Hufford for help refining the datasets and analyses presented in this manuscript. Thank you to Erich D. Jarvis and the Vertebrate Genome Project members for advice and pre-publication access to several genomes (budgerigar and dolphin). The work conducted by the US Department of Energy Joint Genome Institute is supported by the Office of Science of the US Department of Energy under Contract No DE-AC02-05CH1123. Visualization was inspired in part by MCScanX and pairwise ‘river’ plots generated by other software. The use of syntenic orthogroups was originally inspired by work developed by CoGe. MAW’s work on this was supported by the National Institute of General Medical Sciences (NIGMS) of the National Institutes of Health (NIH) grant R35GM124827. JTL would like to thank Ashley Lovell, our friends and family for their support, which allowed him to work on this project during the difficult past two years.

### Data availability

Raw data was sourced entirely from NCBI and Phytozome. Processed data, intermediate files, scripts, plots and source data are all available in the data repository: [https://github.com/jtlovell/GENESPACE\\_data](https://github.com/jtlovell/GENESPACE_data). All source code and documentation for the GENESPACE R package can be found at <https://github.com/jtlovell/GENESPACE>. An interactive viewer for the plant genomes can be found on phytozome at <https://phytozome-next.jgi.doe.gov/tools/dotplot/synteny.html>.

### Description of supplemental data

**Supplemental Data 1.** Pan-genome annotation of the vertebrates using the human genome as the reference coordinate system. For each row (pan-genome entry), there is position information, projected against the gene order coordinate system of the human genome; `pgChr` and `pgOrd` are the human chromosome and gene rank order position of that entry. There is also a `pgID` column, which splits entries that happen to be at the same position but lack a reference gene. The remaining columns are the 17 vertebrate genome IDs. In each column, syntenic orthogroup (unflagged), non-syntenic orthologs (flagged \*) and tandem array members (flagged +) are ‘|’ separated.

**Supplemental Data 2.** Pan-genome annotation of the vertebrates using the chicken genome gene rank order as the reference coordinate system. Columns follow supplemental data 1.

- 732 **Supplemental Data 3.** Physical coordinates of syntenic block  
733 breakpoints among all pairwise combinations of the 17 vertebrate  
734 genomes. Pairwise combinations are distinguished by the genome  
735 IDs presented in the first two columns. The following six columns  
736 (chr1, chr2, start1, start2, end1, end2) are separated where columns  
737 ending in “1” belong to the coordinate system of the genome ID in  
738 the first “genome1” column, while columns ending in “2” belong to  
739 the coordinate system of the genome ID in the second “genome2”  
740 column. Start and end coordinates are in base pairs. Orientation,  
741 column “orient” is flagged as “+” for collinear, “-” for inverted. The  
742 last column, “nhits” is the number of syntenic anchor hits within that  
743 block.
- 744 **Supplemental Data 4.** Physical coordinates of syntenic block  
745 breakpoints among all pairwise combinations of the 8 grass  
746 genomes. Columns follow supplemental data 3.
- 747 **Supplemental Data 5.** Pan-genome annotation of the grasses  
748 using the maize B73 genome gene rank order as the reference  
749 coordinate system. Columns follow supplemental data 1.
- 750 **Supplemental Data 6.** Physical coordinates of syntenic block  
751 breakpoints among all pairwise combinations of the 26 NAM parents.  
752 Columns follow supplemental data 3.
- 753 **Supplemental Data 7.** Pan-genome annotation of the 26 NAM  
754 parents using the maize B73 genome gene rank order as the  
755 reference coordinate system. Columns follow supplemental data 1.
- 756 **Supplemental Data 8.** Pan-genome entries of the 26 maize NAM  
757 founders for each of the three QTL regions in Li et al. 2016. Columns  
758 follow supplemental data 1, with the additional first column “qtl”,  
759 which holds the QTL id, coded as [phenotype] [(private focal  
760 genome)]: [chromosome], [start Mbp]-[end Mbp].
- 761 **Supplemental Data 9.** Pan-genome annotation of the grasses,  
762 explicitly including the *Rho*-duplicated homologs into the graph, and  
763 using the *S. viridis* genome as the reference coordinate system.  
764 Columns follow supplemental data 1.
- 765 **Supplemental Data 10.** Hits between *P. hallii* and *S. viridis*  
766 genes that are members of the same within-block orthogroups and  
767 are syntenic anchors. The first 12 columns (id1, id2, genome1,  
768 genome2, chr1, chr2, start1, end1, ord1, start2, end2, ord2) are  
769 separated where columns ending in “1” belong to the coordinate  
770 system of the genome ID in the first “genome1” column, while  
771 columns ending in “2” belong to the coordinate system of the  
772 genome ID in the second “genome2” column. Start and end are bp  
773 positions, ord is the gene rank order. The two measures of percent  
774 protein identity are given in pid1 and pid2 columns. The block type,  
775 categorized as orthologous (“orth”), over-retained *Rho* paralog  
776 (“overr”), regular *Rho* paralog (“rho”) and ambiguous (“ambig”) are  
777 given in the column blockType.
- 778
- 779 **REFERENCES**
- 780 1. D. M. Emms, S. Kelly, OrthoFinder: phylogenetic orthology  
781 inference for comparative genomics. *Genome Biol.* **20**, 238  
782 (2019).
- 783 2. D. M. Emms, S. Kelly, OrthoFinder: solving fundamental biases  
784 in whole genome comparisons dramatically improves  
785 orthogroup inference accuracy. *Genome Biol.* **16**, 157 (2015).
- 786 3. A. Haug-Baltzell, S. A. Stephens, S. Davey, C. E. Scheidegger,  
787 E. Lyons, SynMap2 and SynMap3D: web-based whole-genome  
788 synteny browsers. *Bioinformatics.* **33**, 2197–2198 (2017).
- 789 4. Y. Wang, H. Tang, J. D. DeBarry, X. Tan, J. Li, X. Wang, T.-H.  
790 Lee, H. Jin, B. Marler, H. Guo, J. C. Kissinger, A. H. Paterson,  
791 MCSanX: a toolkit for detection and evolutionary analysis of  
792 gene synteny and collinearity. *Nucleic Acids Res.* **40**, e49 (2012).
- 793 5. G. Drillon, R. Champeimont, F. Oteri, G. Fischer, A. Carbone,  
794 Phylogenetic Reconstruction Based on Synteny Block and Gene  
795 Adjacencies. *Mol. Biol. Evol.* **37**, 2747–2762 (2020).
- 796 6. O. Simakov, F. Marlétaz, J.-X. Yue, B. O’Connell, J. Jenkins, A.  
797 Brandt, R. Calef, C.-H. Tung, T.-K. Huang, J. Schmutz, N.  
798 Satoh, J.-K. Yu, N. H. Putnam, R. E. Green, D. S. Rokhsar,  
799 Deeply conserved synteny resolves early events in vertebrate  
800 evolution. *Nature Ecology & Evolution.* **4**, 820–830 (2020).
- 801 7. Y. Jiao, J. Li, H. Tang, A. H. Paterson, Integrated syntenic and  
802 phylogenomic analyses reveal an ancient genome duplication in  
803 monocots. *Plant Cell.* **26**, 2792–2802 (2014).
- 804 8. T. Zhao, M. Eric Schranz, Network-based microsynteny analysis  
805 identifies major differences and genomic outliers in mammalian  
806 and angiosperm genomes. *Proc. Natl. Acad. Sci. U. S. A.* **116**,  
807 2165–2174 (2019).
- 808 9. J. T. Lovell, J. Jenkins, D. B. Lowry, S. Mamidi, A. Sreedasyam,  
809 X. Weng, K. Barry, J. Bonnette, B. Campitelli, C. Daum, S. P.  
810 Gordon, B. A. Gould, A. Khasanova, A. Lipzen, A. MacQueen, J.  
811 D. Palacio-Mejía, C. Plott, E. V. Shakirov, S. Shu, Y. Yoshinaga,  
812 M. Zane, D. Kudrna, J. D. Talag, D. Rokhsar, J. Grimwood, J.  
813 Schmutz, T. E. Juenger, The genomic landscape of molecular  
814 responses to natural drought stress in *Panicum hallii*. *Nat.*  
815 *Commun.* **9**, 5213 (2018).
- 816 10. J. T. Lovell, N. B. Bentley, G. Bhattarai, J. W. Jenkins, A.  
817 Sreedasyam, Y. Alarcon, C. Bock, L. B. Boston, J. Carlson, K.  
818 Cervantes, K. Clermont, S. Duke, N. Krom, K. Kubenka, S.  
819 Mamidi, C. P. Mattison, M. J. Monteros, C. Pisani, C. Plott, S.  
820 Rajasekar, H. S. Rhein, C. Rohla, M. Song, R. S. Hilaire, S. Shu,  
821 L. Wells, J. Webber, R. J. Heerema, P. E. Klein, P. Conner, X.  
822 Wang, L. J. Grauke, J. Grimwood, J. Schmutz, J. J. Randall,  
823 Four chromosome scale genomes and a pan-genome  
824 annotation to accelerate pecan tree breeding. *Nat. Commun.* **12**,  
825 4125 (2021).
- 826 11. A. Rhie, S. A. McCarthy, O. Fedrigo, J. Damas, G. Formenti, S.  
827 Koren, M. Uliano-Silva, W. Chow, A. Fungtammasan, J. Kim, C.  
828 Lee, B. J. Ko, M. Chaisson, G. L. Gedman, L. J. Cantin, F.  
829 Thibaud-Nissen, L. Haggerty, I. Bista, M. Smith, B. Haase, J.  
830 Mountcastle, S. Winkler, S. Paez, J. Howard, S. C. Vernes, T. M.  
831 Lama, F. Grutzner, W. C. Warren, C. N. Balakrishnan, D. Burt, J.  
832 M. George, M. T. Biegler, D. Iorns, A. Digby, D. Eason, B.  
833 Robertson, T. Edwards, M. Wilkinson, G. Turner, A. Meyer, A. F.  
834 Kautt, P. Franchini, H. W. Detrich 3rd, H. Svardal, M. Wagner, G.  
835 J. P. Naylor, M. Pippel, M. Malinsky, M. Mooney, M. Simbirsky,  
836 B. T. Hannigan, T. Pesout, M. Houck, A. Misuraca, S. B. Kingan,  
837 R. Hall, Z. Kronenberg, I. Sović, C. Dunn, Z. Ning, A. Hastie, J.  
838 Lee, S. Selvaraj, R. E. Green, N. H. Putnam, I. Gut, J. Ghurye, E.  
839 Garrison, Y. Sims, J. Collins, S. Pelan, J. Torrance, A. Tracey, J.  
840 Wood, R. E. Dagnew, D. Guan, S. E. London, D. F. Clayton, C.  
841 V. Mello, S. R. Friedrich, P. V. Lovell, E. Osipova, F. O. Al-Ajili, S.  
842 Secomandi, H. Kim, C. Theofanopoulou, M. Hiller, Y. Zhou, R. S.  
843 Harris, K. D. Makova, P. Medvedev, J. Hoffman, P. Masterson,  
844 K. Clark, F. Martin, K. Howe, P. Flicek, B. P. Walenz, W. Kwak,  
845 H. Clawson, M. Diekhans, L. Nassar, B. Paten, R. H. S. Kraus, A.  
846 J. Crawford, M. T. P. Gilbert, G. Zhang, B. Venkatesh, R. W.  
847 Murphy, K.-P. Koepfli, B. Shapiro, W. E. Johnson, F. Di Palma,  
848 T. Marques-Bonet, E. C. Teeling, T. Warnow, J. M. Graves, O. A.  
849 Ryder, D. Haussler, S. J. O’Brien, J. Korlach, H. A. Lewin, K.  
850 Howe, E. W. Myers, R. Durbin, A. M. Phillippy, E. D. Jarvis,  
851 Towards complete and error-free genome assemblies of all  
852 vertebrate species. *Nature.* **592**, 737–746 (2021).
- 853 12. Z. J. Chen, A. Sreedasyam, A. Ando, Q. Song, L. M. De  
854 Santiago, A. M. Hulse-Kemp, M. Ding, W. Ye, R. C. Kirkbride, J.  
855 Jenkins, C. Plott, J. Lovell, Y.-M. Lin, R. Vaughn, B. Liu, S.  
856 Simpson, B. E. Scheffler, L. Wen, C. A. Sasaki, C. E. Grover, G.  
857 Hu, J. L. Conover, J. W. Carlson, S. Shu, L. B. Boston, M.  
858 Williams, D. G. Peterson, K. McGee, D. C. Jones, J. F. Wendel,  
859 D. M. Stelly, J. Grimwood, J. Schmutz, Genomic diversifications  
860 of five *Gossypium* allopolyploid species and their impact on  
861 cotton improvement. *Nat. Genet.* **52**, 525–533 (2020).
- 862 13. W. J. Murphy, S. Sun, Z. Q. Chen, J. Pecon-Slattey, S. J.  
863 O’Brien, Extensive conservation of sex chromosome  
864 organization between cat and human revealed by parallel  
865 radiation hybrid mapping. *Genome Res.* **9**, 1223–1230 (1999).
- 866 14. Q. Zhou, J. Zhang, D. Bachtrog, N. An, Q. Huang, E. D. Jarvis,  
867 M. T. P. Gilbert, G. Zhang, Complex evolutionary trajectories of  
868 sex chromosomes across bird taxa. *Science.* **346**, 1246338



- 669 (2014).
- 670 15. L. Kratochvíl, T. Gamble, M. Rovatsos, Sex chromosome  
671 evolution among amniotes: is the origin of sex chromosomes  
672 non-random? *Philos. Trans. R. Soc. Lond. B Biol. Sci.* **376**,  
673 20200108 (2021).
- 674 16. M. T. Ross, D. V. Grafham, A. J. Coffey, S. Scherer, K. McLay,  
675 D. Muzny, M. Platzer, G. R. Howell, C. Burrows, C. P. Bird, A.  
676 Frankish, F. L. Lovell, K. L. Howe, J. L. Ashurst, R. S. Fulton, R.  
677 Sudbrak, G. Wen, M. C. Jones, M. E. Hurles, T. D. Andrews, C.  
678 E. Scott, S. Searle, J. Ramser, A. Whittaker, R. Deadman, N. P.  
679 Carter, S. E. Hunt, R. Chen, A. Cree, P. Gunaratne, P. Havlak, A.  
680 Hodgson, M. L. Metzker, S. Richards, G. Scott, D. Steffen, E.  
681 Sodergren, D. A. Wheeler, K. C. Worley, R. Ainscough, K. D.  
682 Ambrose, M. A. Ansari-Lari, S. Aradhya, R. I. S. Ashwell, A. K.  
683 Babbage, C. L. Baggeley, A. Ballabio, R. Banerjee, G. E. Barker,  
684 K. F. Barlow, I. P. Barrett, K. N. Bates, D. M. Beare, H. Beasley,  
685 O. Beasley, A. Beck, G. Bethel, K. Blechschmidt, N. Brady, S.  
686 Bray-Allen, A. M. Bridgeman, A. J. Brown, M. J. Brown, D.  
687 Bonnin, E. A. Bruford, C. Buhay, P. Burch, D. Burford, J.  
688 Burgess, W. Burrill, J. Burton, J. M. Bye, C. Carder, L. Carrel, J.  
689 Chako, J. C. Chapman, D. Chavez, E. Chen, G. Chen, Y. Chen,  
690 Z. Chen, C. Chinnault, A. Ciccociola, S. Y. Clark, G. Clarke, C.  
691 M. Clee, S. Clegg, K. Clerc-Blankenburg, K. Clifford, V. Cobley,  
692 C. G. Cole, J. S. Conquer, N. Corby, R. E. Connor, R. David, J.  
693 Davies, C. Davis, J. Davis, O. Delgado, D. Deshazo, P. Dhami, Y.  
694 Ding, H. Dinh, S. Dodsworth, H. Draper, S. Dugan-Rocha, A.  
695 Dunham, M. Dunn, K. J. Durbin, I. Dutta, T. Eades, M. Ellwood,  
696 A. Emery-Cohen, H. Errington, K. L. Evans, L. Faulkner, F.  
697 Francis, J. Frankland, A. E. Fraser, P. Galgoczy, J. Gilbert, R.  
698 Gill, G. Glöckner, S. G. Gregory, S. Gribble, C. Griffiths, R.  
699 Grocock, Y. Gu, R. Gwilliam, C. Hamilton, E. A. Hart, A. Hawes,  
700 P. D. Heath, K. Heitmann, S. Hennig, J. Hernandez, B.  
701 Hinzmann, S. Ho, M. Hoffs, P. J. Howden, E. J. Huckle, J.  
702 Hume, P. J. Hunt, A. R. Hunt, J. Isherwood, L. Jacob, D.  
703 Johnson, S. Jones, P. J. de Jong, S. S. Joseph, S. Keenan, S.  
704 Kelly, J. K. Kershaw, Z. Khan, P. Kioschis, S. Klages, A. J.  
705 Knights, A. Kosiura, C. Kovar-Smith, G. K. Laird, C. Langford, S.  
706 Lawlor, M. Leversha, L. Lewis, W. Liu, C. Lloyd, D. M. Lloyd, H.  
707 Loulseged, J. E. Loveland, J. D. Lovell, R. Lozado, J. Lu, R.  
708 Lyne, J. Ma, M. Maheshwari, L. H. Matthews, J. McDowall, S.  
709 McLaren, A. McMurray, P. Meidl, T. Meitinger, S. Milne, G.  
710 Miner, S. L. Mistry, M. Morgan, S. Morris, I. Müller, J. C. Mullikin,  
711 N. Nguyen, G. Nordsiek, G. Nyakatura, C. N. O'Dell, G.  
712 Okwuonu, S. Palmer, R. Pandian, D. Parker, J. Parrish, S.  
713 Pasternak, D. Patel, A. V. Pearce, D. M. Pearson, S. E. Pelan, L.  
714 Perez, K. M. Porter, Y. Ramsey, K. Reichwald, S. Rhodes, K. A.  
715 Ridler, D. Schlessinger, M. G. Schueler, H. K. Sehra, C. Shaw-  
716 Smith, H. Shen, E. M. Sheridan, R. Shownkeen, C. D. Skuce, M.  
717 L. Smith, E. C. Sothoran, H. E. Steingruber, C. A. Steward, R.  
718 Storey, R. M. Swann, D. Swarbreck, P. E. Tabor, S. Taudien, T.  
719 Taylor, B. Teague, K. Thomas, A. Thorpe, K. Timms, A. Tracey,  
720 S. Trevanion, A. C. Tromans, M. d'Urso, D. Verduzco, D.  
721 Villasana, L. Waldron, M. Wall, Q. Wang, J. Warren, G. L. Warry,  
722 X. Wei, A. West, S. L. Whitehead, M. N. Whiteley, J. E.  
723 Wilkinson, D. L. Willey, G. Williams, L. Williams, A. Williamson,  
724 H. Williamson, L. Wilming, R. L. Woodmansey, P. W. Wray, J.  
725 Yen, J. Zhang, J. Zhou, H. Zoghbi, S. Zorilla, D. Buck, R.  
726 Reinhardt, A. Poustka, A. Rosenthal, H. Lehrach, A. Meindl, P. J.  
727 Minx, L. W. Hillier, H. F. Willard, R. K. Wilson, R. H. Waterston,  
728 C. M. Rice, M. Vaudin, A. Coulson, D. L. Nelson, G. Weinstock,  
729 J. E. Sulston, R. Durbin, T. Hubbard, R. A. Gibbs, S. Beck, J.  
730 Rogers, D. R. Bentley, The DNA sequence of the human X  
731 chromosome. *Nature*. **434**, 325–337 (2005).
- 932 17. W. Rens, P. C. M. O'Brien, F. Grützner, O. Clarke, D.  
933 Graphodatskaya, E. Tsend-Ayush, V. A. Trifonov, H. Skelton, M.  
934 C. Wallis, S. Johnston, F. Veyrunes, J. A. M. Graves, M. A.  
935 Ferguson-Smith, The multiple sex chromosomes of platypus  
936 and echidna are not completely identical and several share  
937 homology with the avian Z. *Genome Biol.* **8**, R243 (2007).
- 938 18. B. S. Gaut, J. F. Doebley, DNA sequence evidence for the  
939 segmental allotetraploid origin of maize. *Proc. Natl. Acad. Sci.*  
940 *U. S. A.* **94**, 6809–6814 (1997).
- 941 19. J. T. Lovell, A. H. MacQueen, S. Mamidi, J. Bonnette, J. Jenkins,  
942 J. D. Napier, A. Sreedasyam, A. Healey, A. Session, S. Shu, K.  
943 Barry, S. Bonos, L. Boston, C. Daum, S. Deshpande, A. Ewing,  
944 P. P. Grabowski, T. Haque, M. Harrison, J. Jiang, D. Kudrna, A.  
945 Lipzen, T. H. Pendergast 4th, C. Plott, P. Qi, C. A. Sasaki, E. V.  
946 Shakirov, D. Sims, M. Sharma, R. Sharma, A. Stewart, V. R.  
947 Singan, Y. Tang, S. Thibivillier, J. Webber, X. Weng, M. Williams,  
948 G. A. Wu, Y. Yoshinaga, M. Zane, L. Zhang, J. Zhang, K. D.  
949 Behrman, A. R. Boe, P. A. Fay, F. B. Fritsch, J. D. Jastrow, J.  
950 Lloyd-Reilley, J. M. Martínez-Reyna, R. Matamala, R. B.  
951 Mitchell, F. M. Rouquette Jr, P. Ronald, M. Saha, C. M. Tobias,  
952 M. Udvardi, R. A. Wing, Y. Wu, L. E. Bartley, M. Casler, K. M.  
953 Devos, D. B. Lowry, D. S. Rokhsar, J. Grimwood, T. E. Juenger,  
954 J. Schmutz, Genomic mechanisms of climate adaptation in  
955 polyploid bioenergy switchgrass. *Nature*. **590**, 438–444 (2021).
- 956 20. M. Haas, M. Schreiber, M. Mascher, Domestication and crop  
957 evolution of wheat and barley: Genes, genomics, and future  
958 directions. *J. Integr. Plant Biol.* **61**, 204–225 (2019).
- 959 21. D. M. Goodstein, S. Shu, R. Howson, R. Neupane, R. D. Hayes,  
960 J. Fazo, T. Mitros, W. Dirks, U. Hellsten, N. Putnam, D. S.  
961 Rokhsar, Phytozome: a comparative platform for green plant  
962 genomics. *Nucleic Acids Res.* **40**, D1178–86 (2012).
- 963 22. Z. Ding, S. Weissmann, M. Wang, B. Du, L. Huang, L. Wang, X.  
964 Tu, S. Zhong, C. Myers, T. P. Brunnell, Q. Sun, P. Li,  
965 Identification of Photosynthesis-Associated C4 Candidate  
966 Genes through Comparative Leaf Gradient Transcriptome in  
967 Multiple Lineages of C3 and C4 Species. *PLoS One*. **10**,  
968 e0140629 (2015).
- 969 23. C. Li, B. Sun, Y. Li, C. Liu, X. Wu, D. Zhang, Y. Shi, Y. Song, E.  
970 S. Buckler, Z. Zhang, T. Wang, Y. Li, Numerous genetic loci  
971 identified for drought tolerance in the maize nested association  
972 mapping populations. *BMC Genomics*. **17**, 894 (2016).
- 973 24. M. B. Hufford, A. S. Seetharam, M. R. Woodhouse, K. M.  
974 Chougule, S. Ou, J. Liu, W. A. Ricci, T. Guo, A. Olson, Y. Qiu, R.  
975 Della Coletta, S. Tittes, A. I. Hudson, A. P. Marand, S. Wei, Z.  
976 Lu, B. Wang, M. K. Tello-Ruiz, R. D. Piri, N. Wang, D. W. Kim, Y.  
977 Zeng, C. H. O'Connor, X. Li, A. M. Gilbert, E. Baggs, K. V.  
978 Krasileva, J. L. Portwood 2nd, E. K. S. Cannon, C. M. Andorf, N.  
979 Manchanda, S. J. Snodgrass, D. E. Hufnagel, Q. Jiang, S.  
980 Pedersen, M. L. Syring, D. A. Kudrna, V. Llaca, K. Fengler, R. J.  
981 Schmitz, J. Ross-Ibarra, J. Yu, J. I. Gent, C. N. Hirsch, D. Ware,  
982 R. K. Dawe, De novo assembly, annotation, and comparative  
983 analysis of 26 diverse maize genomes. *Science*. **373**, 655–662  
984 (2021).
- 985 25. M. S. Barker, N. Arrigo, A. E. Baniaga, Z. Li, D. A. Levin, On the  
986 relative abundance of autopolyploids and allopolyploids. *New*  
987 *Phytol.* **210**, 391–398 (2016).
- 988 26. G. Ledyard Stebbins, *Variation and Evolution in Plants*  
989 (Columbia University Press, 1950).
- 990 27. One Thousand Plant Transcriptomes Initiative, One thousand  
991 plant transcriptomes and the phylogenomics of green plants.  
992 *Nature*. **574**, 679–685 (2019).
- 993 28. H. J. Muller, Why Polyploidy is Rarer in Animals Than in Plants.  
994 *Am. Nat.* **59**, 346–353 (1925).
- 995 29. J. C. Preston, E. A. Kellogg, Reconstructing the evolutionary  
996 history of paralogous APETALA1/FRUITFULL-like genes in  
997 grasses (Poaceae). *Genetics*. **174**, 421–437 (2006).
- 998 30. J. C. Preston, A. Christensen, S. T. Malcomber, E. A. Kellogg,  
999 MADS-box gene expression and implications for developmental  
1000 origins of the grass spikelet. *Am. J. Bot.* **96**, 1419–1429 (2009).
- 1001 31. Y. Wu, Z. Zhu, L. Ma, M. Chen, The preferential retention of  
1002 starch synthesis genes reveals the impact of whole-genome  
1003 duplication on grass evolution. *Mol. Biol. Evol.* **25**, 1003–1006  
1004 (2008).
- 1005 32. P.-F. Ma, Y.-L. Liu, G.-H. Jin, J.-X. Liu, H. Wu, J. He, Z.-H. Guo,  
1006 D.-Z. Li, The Pharus latifolius genome bridges the gap of early  
1007 grass evolution. *Plant Cell*. **33**, 846–864 (2021).

- 1008 33. X. Wang, H. Tang, A. H. Paterson, Seventy Million Years of  
1009 Concerted Evolution of a Homoeologous Chromosome Pair, in  
1010 Parallel, in Major Poaceae Lineages. *Plant Cell*. **23**, 27–37  
1011 (2011).
- 1012 34. Y. Zhou, L. Shearwin-Whyatt, J. Li, Z. Song, T. Hayakawa, D.  
1013 Stevens, J. C. Felonon, E. Peel, Y. Cheng, F. Pajpach, N.  
1014 Bradley, H. Suzuki, M. Nikaido, J. Damas, T. Daish, T. Perry, Z.  
1015 Zhu, Y. Geng, A. Rhie, Y. Sims, J. Wood, B. Haase, J.  
1016 Mountcastle, O. Fedrigo, Q. Li, H. Yang, J. Wang, S. D.  
1017 Johnston, A. M. Phillippy, K. Howe, E. D. Jarvis, O. A. Ryder, H.  
1018 Kaessmann, P. Donnelly, J. Korlach, H. A. Lewin, J. Graves, K.  
1019 Belov, M. B. Renfree, F. Grutzner, Q. Zhou, G. Zhang, Platypus  
1020 and echidna genomes reveal mammalian biology and evolution.  
1021 *Nature*. **592**, 756–762 (2021).
- 1022 35. T. S. Mikkelsen, M. J. Wakefield, B. Aken, C. T. Amemiya, J. L.  
1023 Chang, S. Duke, M. Garber, A. J. Gentles, L. Goodstadt, A.  
1024 Heger, J. Jurka, M. Kamal, E. Mauceli, S. M. J. Searle, T.  
1025 Sharpe, M. L. Baker, M. A. Batzer, P. V. Benos, K. Belov, M.  
1026 Clamp, A. Cook, J. Cuff, R. Das, L. Davidow, J. E. Deakin, M. J.  
1027 Fazzari, J. L. Glass, M. Grabherr, J. M. Grealley, W. Gu, T. A.  
1028 Hore, G. A. Huttley, M. Kleber, R. L. Jirtle, E. Koina, J. T. Lee, S.  
1029 Mahony, M. A. Marra, R. D. Miller, R. D. Nicholls, M. Oda, A. T.  
1030 Papefuss, Z. E. Parra, D. D. Pollock, D. A. Ray, J. E. Schein, T.  
1031 P. Speed, K. Thompson, J. L. VandeBerg, C. M. Wade, J. A.  
1032 Walker, P. D. Waters, C. Webber, J. R. Weidman, X. Xie, M. C.  
1033 Zody, Broad Institute Genome Sequencing Platform, Broad  
1034 Institute Whole Genome Assembly Team, J. A. M. Graves, C. P.  
1035 Ponting, M. Breen, P. B. Samollow, E. S. Lander, K. Lindblad-  
1036 Toh, Genome of the marsupial *Monodelphis domestica* reveals  
1037 innovation in non-coding sequences. *Nature*. **447**, 167–177  
1038 (2007).
- 1039 36. V. Jagannathan, C. Hitte, J. M. Kidd, P. Masterson, T. D.  
1040 Murphy, S. Emery, B. Davis, R. M. Buckley, Y.-H. Liu, X.-Q.  
1041 Zhang, T. Leeb, Y.-P. Zhang, E. A. Ostrander, G.-D. Wang,  
1042 Dog10K\_Boxer\_Tasha\_1.0: A Long-Read Assembly of the Dog  
1043 Reference Genome. *Genes*. **12** (2021),  
1044 doi:10.3390/genes12060847.
- 1045 37. S. Mamidi, A. Healey, P. Huang, J. Grimwood, J. Jenkins, K.  
1046 Barry, A. Sreedasyam, S. Shu, J. T. Lovell, M. Feldman, J. Wu,  
1047 Y. Yu, C. Chen, J. Johnson, H. Sakakibara, T. Kiba, T. Sakurai,  
1048 R. Tavares, D. A. Nusinow, I. Baxter, J. Schmutz, T. P. Brutnell,  
1049 E. A. Kellogg, A genome resource for green millet *Setaria viridis*  
1050 enables discovery of agronomically valuable loci. *Nat.*  
1051 *Biotechnol.* **38**, 1203–1210 (2020).
- 1052 38. A. H. Paterson, J. E. Bowers, R. Bruggmann, I. Dubchak, J.  
1053 Grimwood, H. Gundlach, G. Haberer, U. Hellsten, T. Mitros, A.  
1054 Poliakov, J. Schmutz, M. Spannagl, H. Tang, X. Wang, T.  
1055 Wicker, A. K. Bharti, J. Chapman, F. A. Feltus, U. Gowik, I. V.  
1056 Grigoriev, E. Lyons, C. A. Maher, M. Martis, A. Narechania, R. P.  
1057 Ollilar, B. W. Penning, A. A. Salamov, Y. Wang, L. Zhang, N. C.  
1058 Carpita, M. Freeling, A. R. Gingle, C. T. Hash, B. Keller, P. Klein,  
1059 S. Kresovich, M. C. McCann, R. Ming, D. G. Peterson,  
1060 Mehboob-ur-Rahman, D. Ware, P. Westhoff, K. F. X. Mayer, J.  
1061 Messing, D. S. Rokhsar, The Sorghum bicolor genome and the  
1062 diversification of grasses. *Nature*. **457**, 551–556 (2009).
- 1063 39. R. Jain, J. Jenkins, S. Shu, M. Chern, J. A. Martin, D. Copetti, P.  
1064 Q. Duong, N. T. Pham, D. A. Kudrna, J. Talag, W. S. Schackwitz,  
1065 A. M. Lipzen, D. Dilworth, D. Bauer, J. Grimwood, C. R. Nelson,  
1066 F. Xing, W. Xie, K. W. Barry, R. A. Wing, J. Schmutz, G. Li, P. C.  
1067 Ronald, Genome sequence of the model rice variety KitaakeX.  
1068 *BMC Genomics*. **20**, 905 (2019).
- 1069 40. International Brachypodium Initiative, Genome sequencing and  
1070 analysis of the model grass *Brachypodium distachyon*. *Nature*.  
1071 **463**, 763–768 (2010).
- 1072 41. T. Zhu, L. Wang, H. Rimbart, J. C. Rodriguez, K. R. Deal, R. De  
1073 Oliveira, F. Choulet, G. Keeble-Gagnère, J. Tibbits, J. Rogers, K.  
1074 Eversole, R. Appels, Y. Q. Gu, M. Mascher, J. Dvorak, M.-C.  
1075 Luo, Optical maps refine the bread wheat *Triticum aestivum* cv.  
1076 Chinese Spring genome assembly. *Plant J*. **107**, 303–314 (2021).
- 1077 42. M. Dowle, A. Srinivasan, data.table: Extension of `data.frame`  
1078 (2021), (available at [https://CRAN.R-](https://CRAN.R-project.org/package=data.table)  
1079 [project.org/package=data.table](https://CRAN.R-project.org/package=data.table)).
- 1080 43. M. Hahsler, M. Piekenbrock, D. Doran, dbSCAN: Fast Density-  
1081 Based Clustering with R. *J. Stat. Softw.* **91** (2019),  
1082 doi:10.18637/jss.v091.i01.
- 1083 44. G. Csardi, T. Nepusz, Others, The igraph software package for  
1084 complex network research. *InterJournal, complex systems*.  
1085 **1695**, 1–9 (2006).
- 1086 45. H. Pagès, P. Aboyou, R. Gentleman, S. DebRoy, Biostrings:  
1087 Efficient manipulation of biological strings (2020), (available at  
1088 <https://bioconductor.org/packages/Biostrings>).
- 1089 46. M. Lawrence, R. Gentleman, V. Carey, rtracklayer: an R package  
1090 for interfacing with genome browsers. *Bioinformatics*. **25**, 1841–  
1091 1842 (2009).
- 1092 47. B. Buchfink, K. Reuter, H.-G. Drost, Sensitive protein alignments  
1093 at tree-of-life scale using DIAMOND. *Nat. Methods*. **18**, 366–368  
1094 (2021).
- 1095 48. J. C. Motamayor, K. Mockaitis, J. Schmutz, N. Haiminen, D.  
1096 Livingstone 3rd, O. Cornejo, S. D. Findley, P. Zheng, F. Utro, S.  
1097 Royaert, C. Saski, J. Jenkins, R. Podicheti, M. Zhao, B. E.  
1098 Scheffler, J. C. Stack, F. A. Feltus, G. M. Mustiga, F. Amores, W.  
1099 Phillips, J. P. Marelli, G. D. May, H. Shapiro, J. Ma, C. D.  
1100 Bustamante, R. J. Schnell, D. Main, D. Gilbert, L. Parida, D. N.  
1101 Kuhn, The genome sequence of the most widely cultivated  
1102 cacao type and its use to identify candidate genes regulating  
1103 pod color. *Genome Biol*. **14**, r53 (2013).
- 1104 49. L. Komsta, outliers: Tests for outliers (2011), (available at  
1105 <https://CRAN.R-project.org/package=outliers>).
- 1106 50. H. Wickham, ggplot2: Elegant Graphics for Data Analysis (2016),  
1107 (available at <https://ggplot2.tidyverse.org>).
- 1108 51. E. Neuwirth, RColorBrewer: ColorBrewer palettes [Software]  
1109 (2014), (available at [https://CRAN.R-](https://CRAN.R-project.org/package=RColorBrewer)  
1110 [project.org/package=RColorBrewer](https://CRAN.R-project.org/package=RColorBrewer)).
- 1111 52. Garnier, Simon, Ross, Noam, Rudis, Robert, Camargo, A. Pedro,  
1112 Sciaini, Marco, Scherer, Cédric, viridis - Colorblind-Friendly  
1113 Color Maps for R (2021), , doi:10.5281/zenodo.4679424.

1117

## SUPPLEMENTAL FIGURES

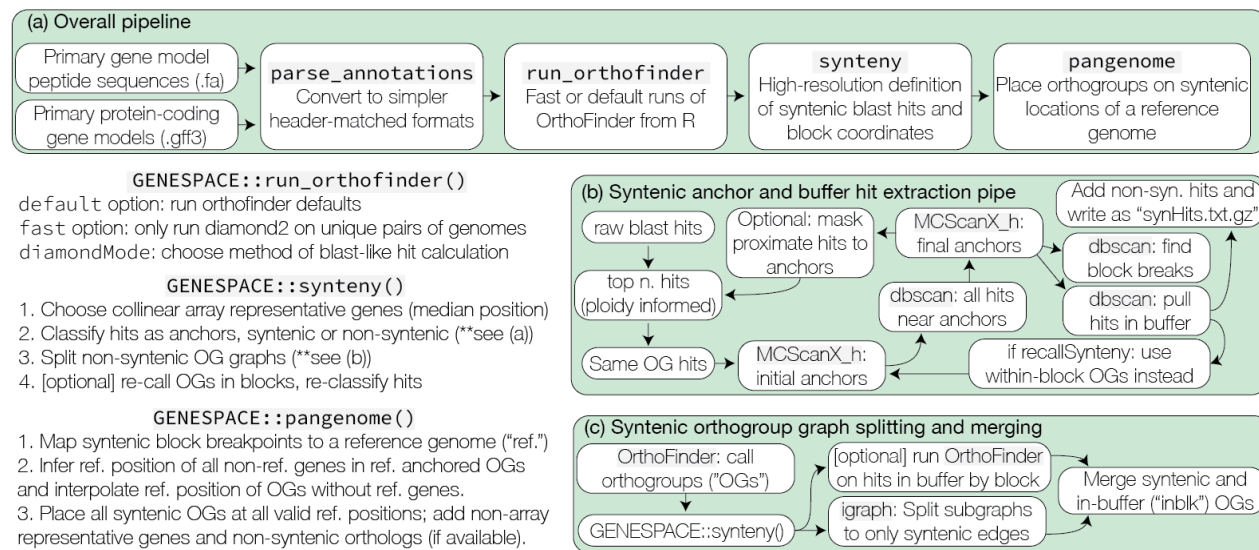

**Supplemental Figure 1 | Description of the pipeline.** Green boxes show the primary (a), synteny (b) and syntenic orthogroup (c) modules. Verbal descriptions of the three main GENESPACE functions are presented in the bottom right.

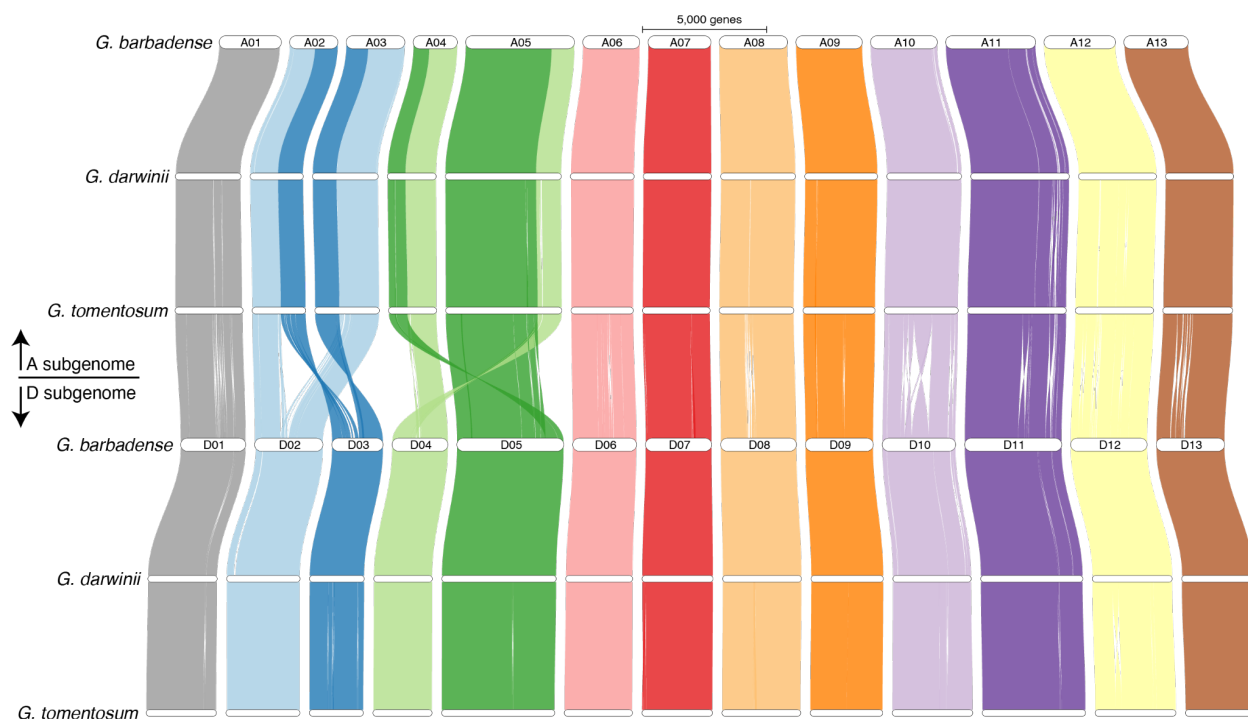

**Supplemental Figure 2 | Cotton sub-genome synteny.** The synteny map for the split-sub-genome run is presented here. The two *G. barbadense* sub-genome chromosomes are labeled; the top three A sub-genome and bottom three D sub-genome chromosomes map to these. Syntenic braids are colored following the D sub-genome chromosome order.



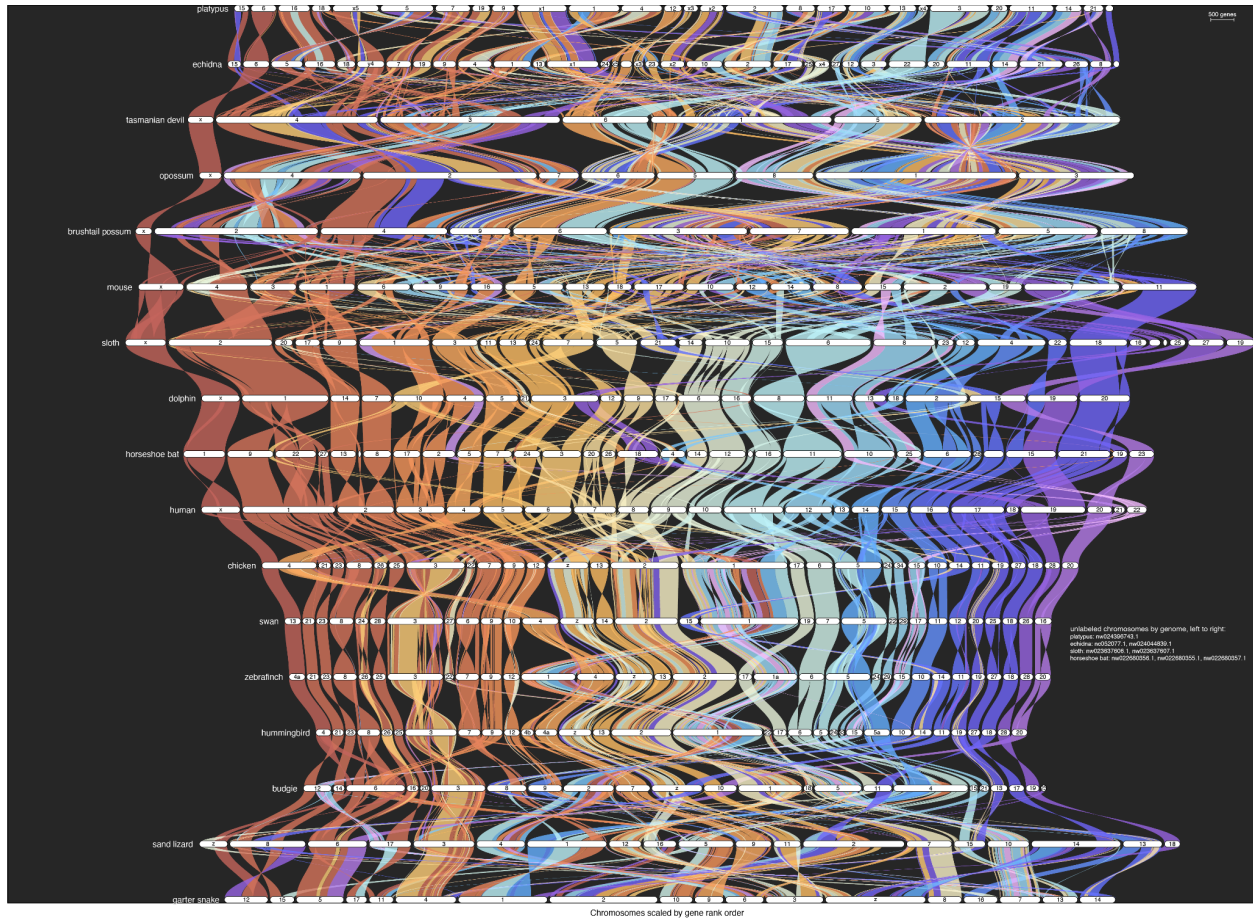

18  
19 **Supplemental Figure 3 | The full synteny map across 17 vertebrate genomes.** Chromosomes are ordered to maximize synteny with human chromosomes  
20 [X, Y, 1-22]. Syntenic braids are color coded by their mapping to the human chromosomes. A few scaffolds were too small for an informative label. These are  
21 listed on the right. Chromosome sizes are scaled by the number of genes with syntenic mappings to other genomes.  
22

Lovell et al. 2022 (preprint) GENESPACE comparative genomics

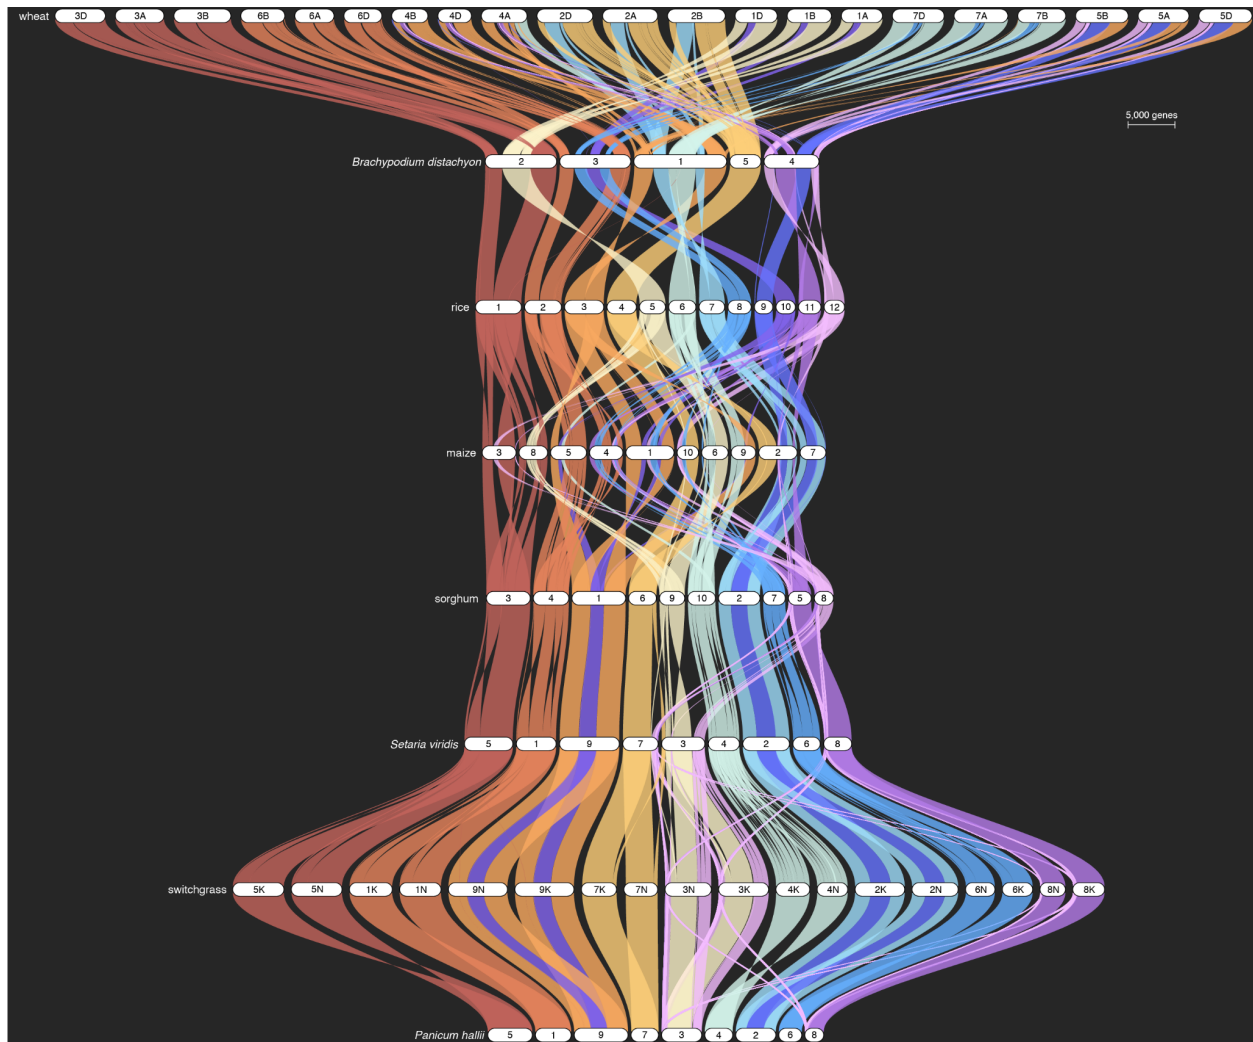

**Supplemental Figure 4 | The full synteny map across 8 grass genomes.** Chromosomes are ordered to maximize synteny with rice chromosomes [1-12]. Syntenic braids are color coded by their mapping to the rice chromosomes. Chromosome sizes are scaled by the number of genes with syntenic mappings to other genomes.

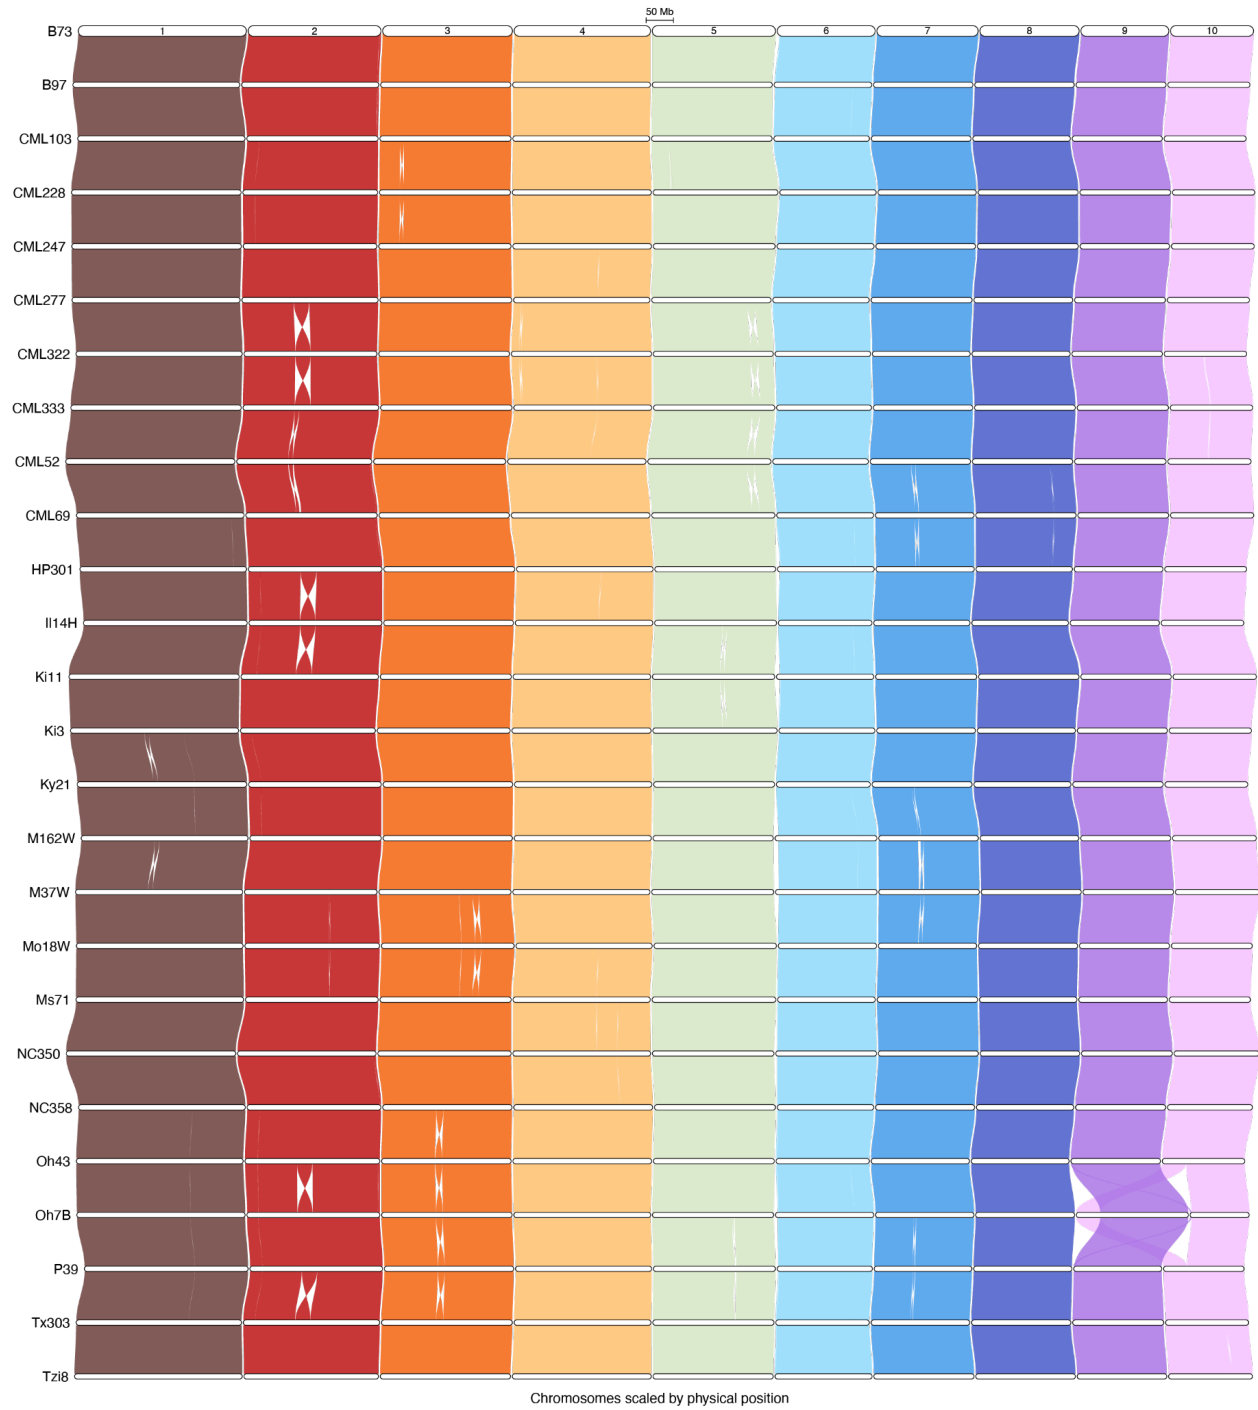

29  
30 **Supplemental Figure 5 | The full syteny map across 26 maize genomes.** Chromosomes are ordered 1-10, following the B73 genome labels at the top of  
31 the figure. Syntenic braids are color coded by their mapping to the B73 chromosomes. Chromosome sizes are scaled by their physical size.  
32  
33

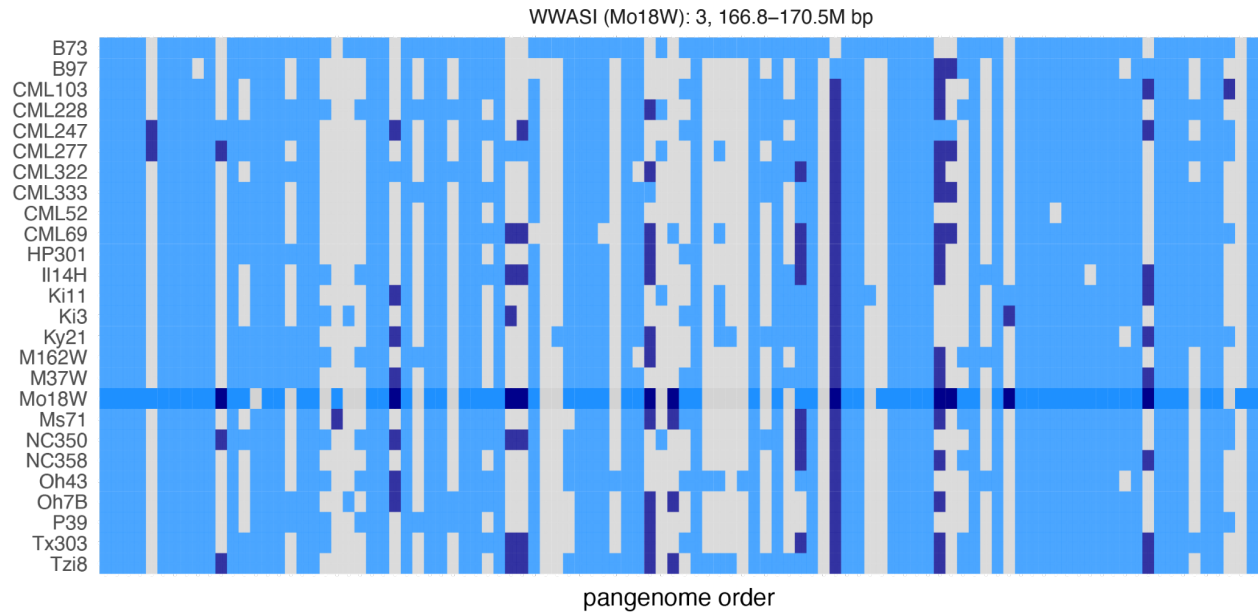

34  
35 **Supplemental Figure 6 | Map of presence absence variation in the larger chromosome 3 QTL interval.** Genome labels (y-axis) follow the order of other  
36 plots. Pan-genome entries are ordered by physical position within the interval on the x-axis. Gray panes are absences, dark blue are multi-copy and light blue are  
37 single-copy genes in each entry-by-genome combination. The more saturated colors correspond to the Mo18W genome, which has an outlier effect on this  
38 interval.  
39
